# 1 Hormones as adaptive control systems 2 in juvenile fish

---

3 **Running title: Optimal hormonal control of fish growth**

4 Jacqueline Weidner, Camilla Håkonsrud Jensen, Jarl Giske, Sigrunn Eliassen, Christian  
5 Jørgensen

6

7 University of Bergen, Department of Biological Sciences, Postboks 7803, N-5020 Bergen, Norway

8 E-Mail: [Jacqueline.Weidner@uib.no](mailto:Jacqueline.Weidner@uib.no)

9

10 **Keywords (3-6 words):** hormone, dynamic state-dependent model, strategy, growth, survival,  
11 allocation

12

13

14

## 15 **Summary statement**

16 We combine physiological, environmental and evolutionary aspects of fish growth in a state-  
17 dependent model where the optimal regulation of growth and survival is achieved through hormonal  
18 regulation of behaviour.

## 19 **Abstract**

20 Growth is an important theme in many biological disciplines. Physiologists often relate growth rates  
21 to hormonal control of essential processes. Ecologists often study growth as function of gradients or  
22 combinations of environmental factors. Fewer studies have investigated the combined effects of  
23 environmental and hormonal control on growth. Here, we present an evolutionary optimization  
24 model of fish growth that combines internal regulation of growth by hormone levels with the  
25 external influence of food availability and predation risk. Hormones are represented by growth  
26 hormone, thyroid hormone and orexin functions. By studying a range from poor to rich  
27 environments, we find that the level of food availability in the environment results in different  
28 evolutionarily optimal strategies of hormone levels. With more food available, higher levels of  
29 hormones are optimal, resulting in higher food uptake and growth. By using this fitness-based  
30 approach we also find a consequence of evolutionary optimization of survival on optimal hormone  
31 use. Where foraging is risky, aerobic scope can be used strategically to increase the chance of  
32 escaping from predators. By comparing model results to empirical observations, many mechanisms  
33 can be recognized, for instance a change in pace-of-life due to resource availability, and reduced  
34 emphasis on reserves in more stable environments.

## 35 **Introduction**

36 It is a central aim of biology to understand how evolution has led to a specific organism design  
37 through natural selection. As Tinbergen (1963) pointed out, any trait can be understood both in  
38 terms of its mechanism and its evolution, and the philosopher Daniel Dennett (2017) has simplified  
39 this into two questions. If one for example is interested in fish growth, one may first ask “*How come*  
40 *fish grow?*” The discipline of physiology has excelled at answering this type of questions about  
41 underlying mechanisms, and has detailed triggers, pathways, intermediates, regulation,  
42 development, and function from the molecular level to that of the organism. There is another set of  
43 explanations for fish growth if one asks: “*What do fish grow for?*” “What for” questions are about the  
44 adaptive significance, about the effects a trait has on survival, growth, reproduction, and ultimately  
45 fitness. This evolutionary dimension introduces *purposiveness* to biology (Dennett 2017): a goal-  
46 directedness that goes beyond blind chains of causation like Hume’s billiard balls that crash into each  
47 other. Rather, processes occur to fill a purpose, to obtain some kind of aim, for example feedback  
48 processes that restore homeostasis, or drives or urges that ensure survival, growth, and  
49 reproduction. It must be emphasized that this is not an externally imposed or top-down purpose. It is  
50 a historic consequence of natural selection, where alleles with positive effects on survival and  
51 reproduction become more common in the gene pool, and their consequence is that organisms  
52 appear as goal-driven in their development, physiology, endocrinology, cognition, and behaviour  
53 (Andersen et al., 2016; Budaev et al., 2019; Giske et al., 2013).

54 “What for” questions have been addressed by evolutionary ecology, life history theory, and  
55 behavioural ecology, where empirical experiments and observations have often been inspired by  
56 theoretical considerations that have had one important limitation: they have typically ignored the  
57 proximate level of “how come” questions. This was epitomized by Alan Grafen as the phenotypic  
58 gambit, inspired by the chess move where one makes a sacrifice to gain a longer-term advantage  
59 (Grafen, 1984). The phenotypic gambit was a methodological tactic where one tossed away all the  
60 mechanistic detail and simply assumed unbounded phenotypic flexibility. Then and now, this was in  
61 many cases a necessary assumption to be able to answer “what for” questions. If models concluded  
62 that a trait had an adaptive advantage, the evolutionary ecologist would expect to see that trait to  
63 have evolved in real organisms in the wild. Any physiologist will immediately react to this as naïve  
64 and utterly unrealistic: Real traits originate from genes, are built through biochemistry, obey the laws  
65 of physics, and any information used must emerge from a sensory organ or use local molecules  
66 directly. The organisms that live today share many design features that have evolved precisely  
67 because they allow flexibility within the boundaries set by these constraints. Over time this has led to  
68 descendant lineages that were more likely to evolve to fill new niches and respond to new selection  
69 pressures. The combination of “how” and “what for” questions, thus, reveals insights that one of  
70 them alone could not give (Sinervo and Svensson, 1998). On the other hand, the traditional  
71 separation of mechanisms from the individual’s experienced selection pressures or ecological  
72 challenges, tears them out of a natural framework of constraints. It also builds on the assumption  
73 that selection pressures influence underlying mechanisms much less than the actual behaviour or  
74 adaptation they produce (Garland et al., 2016).

75 In this paper, we focus on one architectural design feature for control of the organism, its hormone  
76 system, and with a model we ask several questions that we believe are useful to stimulate thought  
77 both among physiologists and evolutionary ecologists. For example, are key hormone systems  
78 sufficient to enact the adaptive flexibility seen in growth across different environments? Are there  
79 ways in which we can conclude that the major hormone systems are adaptive? If we treat the model  
80 as a thought experiment with unlimited flexibility in hormone expression, will observed correlations  
81 emerge between environments and hormones? Between hormones? And with ontogeny? The model  
82 is about growth and related survival in juvenile fish, but more importantly it aims to show how one  
83 can overcome the phenotypic gambit, not only in the model specification, but hopefully also by  
84 helping scientists from the two disciplines in asking and answering questions together.

85 It can be instructive to compare our process-based model with other modelling approaches to better  
86 see the type of questions we can reach for. One type of well-known modelling tool in physiology are  
87 the dynamic energy budget models (DEB, (Kooijman, 2001; Kooijman, 1993; Nisbet et al., 2000;  
88 Zonneveld and Kooijman, 1989)). These follow resources and energy in great physiological detail  
89 from ingestion to growth and reproduction, and may provide good fit between predicted growth  
90 patterns and those observed in experiments and in the wild. One can describe DEB as “feed-forward  
91 bioenergetics”, where processes run as fast as resources or constraints allow. This perspective is  
92 similar to a combustion engine where the amount of gas fed into the carburettor determines the  
93 engine’s power and speed. Models of feed-forward bioenergetics are designed to question what  
94 happens to metabolic processes if more or less food is processed, when external conditions change,  
95 for example temperature, or when there are extra costs due to e.g. disease or reproduction. These  
96 are analogous to how fast a car would go if it is loaded heavy with passengers, if cooling is difficult on  
97 a particularly warm day, or if one of the spark plugs doesn’t fire.

98 In contrast, our model optimizes survival through the juvenile phase, where the optimal growth rate  
99 emerges from the effects of growth on fitness. These may depend on the abundance of predators,  
100 food availability or duration of the growth season. Here, behaviour and physiology have to provide  
101 the resources required to achieve the target growth rate. This can be described as “by-demand  
102 bioenergetics”; a goal-driven control system that translates fitness incentives emerging in ecology  
103 into physiological responses that endow the phenotype with a performance to fulfil the set goal. This  
104 would be analogous to how hard the driver presses the gas pedal, which can depend on the speed  
105 limit, whether the driver is heading for the nearest hospital with a passenger about to give birth, or  
106 whether the passenger is a child who easily becomes car-sick. The car is a tool to achieve a goal in  
107 the driver’s mind, much like the physiology of an organism has potentials that can, if regulated  
108 appropriately, achieve fitness. So, while evolutionary ecology often seeks the optimal behavioural  
109 route to a goal, we here seek the optimal control mechanism along a given road.

110 There are several ways in which these control mechanisms can regulate and interfere with the  
111 individual’s bioenergetics. As the system is goal-driven a certain amount of energy has to be directed  
112 to mechanisms needed to achieve the goal. The process of allocation of limited resources towards  
113 competing uses (Fisher, 1930) is essential here. Also, as resources must be acquired before they can  
114 be distributed, the acquisition rate is of importance. Often models deal with either acquisition or  
115 allocation. Here we combine the two in one model organism and under one control system. In this  
116 way “by-demand bioenergetics” can drive the phenotype towards its goal by increasing the goal-  
117 directed energy supply through acquisition and allocation. Upregulating “by-demand bioenergetics”  
118 in such a way can push the organisms into a state of fast growth and early maturation. From an  
119 evolutionary point of view this would mean that life history changes from slow to fast.

120 Changes in growth rate are always accommodated by changes in other physiological, endocrinal and  
121 behavioural properties. This is due to the fact that mechanisms supporting growth have to be  
122 adapted to the new circumstances of fast growth, but also because of the cross-linking of mechanism  
123 and pleiotropic effects of hormones. Consequently, can a change in growth rate entail many other  
124 behavioural, physiological, endocrinal and life-history traits, which altogether form a suite of traits.  
125 This suite has been called pace-of-life syndrome (POLLS, (Reale et al., 2010)). A special case of a fast  
126 life history is the “super” phenotype (Reznick et al., 2000) that makes use of rich environments by  
127 increasing its acquisition rate. “Super” phenotypes upregulate their energy-supply to all processes  
128 keeping allocation proportions constant. Thus, the whole phenotype is pushed into a highly energy-  
129 demanding but fast processing state.

130 To be specific about the goal-directness of growth in a proximate and mechanistic perspective, we  
131 treat the phenotype as having potential for a range of physiological rates, and focus on a simplified  
132 set of hormones as the control system. Because there are hundreds of hormones and associated  
133 signalling molecules in a typical fish or mammal, it was necessary to simplify to a level of complexity  
134 that is easier to grasp and analyse. We therefore first describe how we have interpreted the major  
135 regulatory routes that control growth in fish, and end up using three hormones and a neuropeptide  
136 that each play a specific role in our model. To a physiologist this simplification is most certainly  
137 incomplete as it definitely leaves out important elements, but our aim is to stimulate thinking, and  
138 we therefore ask the reader to follow us into this intermediate level of complexity. We now first  
139 describe how we have implemented our model, before we use the model to point to some

140 interesting insights of the hormone system as adaptive, and ways forward to further bridging the  
141 proximate “how come” and the ultimate “what for” traditions in biology.

142

## 143 **Model**

144 The model organism is a generalized juvenile fish, and we choose parameters mostly from Atlantic  
145 cod (*Gadus morhua*) which is a well-studied species. The model follows juvenile fish as they grow  
146 through a size window where they typically remain immature. During this juvenile phase we let  
147 internal mechanisms like metabolism and growth be regulated by two hormones, growth hormone  
148 and thyroid hormones, and the neuropeptide orexin. They determine growth, metabolic rate, and  
149 appetite, respectively, but importantly for the model they are also involved in trade-offs related to  
150 risk.

151 We use a state-dependent dynamic model (Clark and Mangel, 2000). This algorithm first optimizes a  
152 strategy that can be considered the evolutionary adaptation to a certain environment. In the case of  
153 this model the strategy is the optimal hormone levels for any combination of a fish’ size and energy  
154 reserves. When the optimal strategy has been found, we investigate this adaptation by simulating  
155 individuals that live in the given environment and use the calculated optimal policy, and we record its  
156 trajectory of growth, hormone expression, and individual states.

## 157 **Methods**

### 158 **Simplifying the hormone systems for model implementation**

159 The central challenge for our model organism is to grow (and survive) up to adult size. Although a  
160 high number of hormonal molecules and mechanisms are used to dynamically control physiology and  
161 behaviour in natural fish, we single out three clusters: growth, energy acquisition, and overall  
162 metabolism. When combined in a life history model, these also determine energy allocation to  
163 reserves. Below we describe the main hormones that work along these axes, and we call them  
164 “hormone functions” to distinguish them from real molecules. The main components of our mode  
165 are thus the growth hormone function, the orexin function, and the thyroid hormone function.  
166 Leptin also plays a role as it contains information about the individual’s energy reserves.

167 Decisions connected to growth influence the individual’s life history. For example, fast growth  
168 enables organisms to reach sexual maturity relatively early in their lives and start reproducing prior  
169 to conspecifics. Growth processes can make up a major part of energy use. The main endocrinal  
170 driver of growth in fish and mammals is growth hormone and its associated hormone cascade  
171 (Björnsson, 1997; Jönsson and Björnsson, 2002). Thus, in terms of “by-demand bioenergetics”,  
172 growth hormone drives the fish towards sizes at which they can mature and reproduce, implying that  
173 fitness considerations have set up an energy-demand that the organism needs to fulfil.

174 Part of the growth processes initiated by the secretion of growth hormone is the accretion of  
175 proteins and breakdown of lipids. Both processes influence the individual’s condition, and they  
176 increase metabolism. To maintain its condition, the individual must increase its energy uptake  
177 through foraging. Appetite and the initiation of feeding behaviour are very complex processes,  
178 comprising central nervous system and peripheral signals. An important group of neuropeptides are

179 orexins, as they are produced in the hypothalamus, where signals on condition and energy-budget of  
180 the individual are integrated. Thus, orexins are the second step in the physiological response of the  
181 “by-demand bioenergetics” model, as they regulate the individual’s energy acquisition in order to  
182 fulfil the growth goal set by growth hormone.

183 To achieve growth, growth hormone as initiator and orexin as energy-suppliant are important factors  
184 influencing growth rate. Diving into growth mechanisms, there is another hormone and its associated  
185 cascade being ubiquitous for growth to happen: thyroid hormones. Hormones from the growth  
186 hormone cascade and the thyroid hormone cascade make up a complicated network in which they  
187 promote each other’s secretion, conversion, receptor activity and, in a chronological order, the  
188 developments of both cartilage and bone (Cabello and Wrutniak, 1989; Robson et al., 2002). Another  
189 reason for implementing a function on thyroid hormones is their regulating effect on metabolism  
190 (see below). On the one hand, an upregulated metabolism can be of advantage when energy is  
191 abundant. This would push the individual into a state of high energy turn-over. On the other hand,  
192 any increase in foraging exposes the individual to a trade-off between energy provisioning and  
193 foraging-related risk. The increased metabolism due to thyroid hormones can weaken this trade-off  
194 by allowing for faster metabolism and higher potential activity level, in turn causing higher escaping  
195 ability in case of a predator attack. In terms of the “by-demand bioenergetics” model the individual’s  
196 performance to fulfil the set growth goal is improved by higher energy turn-over and oxygen uptake  
197 rates when conditions allow.

198 Starting with empirical data on stimuli, hormone regulation, and effects, we now present the  
199 functions and mechanisms of these three clusters. Thereafter we will use this as background for the  
200 implementation in model code.

### 201 *The Growth Hormone Function (GHF)*

202 *Effects* Growth hormone (GH) is expressed throughout life. In humans, maximal secretion is seen  
203 during puberty, then decreasing with age (Vermeulen, 2002; Zadik et al., 1985). GH seems to affect  
204 metabolism and body composition (Velez et al., 2019; Vermeulen, 2002; Yang et al., 2018), but main  
205 effects are directed towards growth in bone (Nilsson et al., 2005; Robson et al., 2002) and muscles  
206 (Grossman et al., 1997). For fish, a relationship between GH levels and compensatory growth is  
207 suggested (Ali et al., 2003). To some extent GH also influences behaviour, either in a direct or indirect  
208 way (Jönsson and Björnsson, 2002). As growth rates can be constrained by environmental factors as  
209 food availability, GH levels and levels of its mediator IGF-1 should underlie seasonal fluctuations.  
210 Fluctuations, which might be stimulated by changes in photoperiod, have been observed in reindeer  
211 (*Rangifer tarandus*) (Suttie et al., 1991; Suttie et al., 1993) and Arctic char (*Salvelinus alpinus*)  
212 (Jørgensen and Johnsen, 2014).

213 *Axis* GH production is controlled by a hormonal cascade, the somatotrophic axis. On top, GH-  
214 releasing factor (GRF) and/or somatostatin (SRIF) are released by the hypothalamus upon  
215 environmental or peripheral stimuli. These regulate the anterior pituitary activity, which alters the  
216 rate of GH secretion. GH effects are mediated by IGF-1 in most tissues. Both GH and IGF-1 can affect  
217 mechanisms in target tissues (Gatford et al., 1998; Peter and Marchant, 1995).

218 *Stimuli* Through evolution the number of factors regulating GH release has decreased, while it is  
219 multifactorial in fish, regulation in mammals is mostly achieved by a “dual control system” (Gahete et

220 al., 2009). The mammalian system consists of one main stimulator, growth hormone-releasing  
221 hormone (GHRH) and one main inhibitor, somatostatin (SRIF). Additional stimulators of minor  
222 importance are neuropeptide Y (NPY), ghrelin, exercise, and in some species leptin (Gahete et al.,  
223 2009; Hamrick and Ferrari, 2008; Kojima et al., 1999; Lanfranco et al., 2003). Leptin signals the  
224 current reserve size (Cammisotto and Bendayan, 2007), while ghrelin prepares the digestive tract for  
225 incoming food (Müller et al., 2015). In fish, a second main stimulator is pituitary adenylate cyclase  
226 activating polypeptide (PACAP). Additional weaker stimuli come from thyrotropin-releasing hormone  
227 (TRH), gonadotropin-releasing hormone (GnRH) and others. Leptin does not exert a direct stimulus in  
228 fish (Gahete et al., 2009).

229 Melatonin (Suttie et al., 1992; Suttie et al., 1991) regulates IGF-1 secretion. It is important to notice  
230 that one stimulus can have different effects on GH and IGF-1. This is for example the case in a study  
231 on fasted tilapia (*Oreochromis mossambicus*), where both body growth rates and body weight in  
232 males decreased due to fasting. IGF-1 levels correlated with growth rates, but GH levels were  
233 unchanged. A possible explanation is that available energy is used to cover basal metabolism first,  
234 while hormone levels are adapted to reduce or cease growth (Uchida et al., 2003). This is also the  
235 case for a diet experiment with Arctic char. Concentrations of growth hormone did not reflect  
236 changes in body weight, but IGF-1 concentrations did (Cameron et al., 2007). Unchanged or even  
237 elevated levels of GH can be part of a fasting response in which GH impels lipolysis and prevents  
238 protein degradation (Richmond et al., 2010).

239 Inhibition of GH is also exerted via IGF-1 in a long feedback loop, in both fish and mammals (Gahete  
240 et al., 2009).

#### 241 *The Orexin Function (OXF)*

242 *Effects* Orexin is a neuropeptide known from humans (Kalamatianos et al., 2014; Oka et al., 2004;  
243 Tomasik et al., 2004), pigs (Kaminski et al., 2013), rats (Dube et al., 1999), and fish (Facciolo et al.,  
244 2010). There are two types of orexin, A and B, which have several effects, including feeding-related  
245 and behavioural effects (Cai et al., 2002; Rodgers et al., 2002). Orexin A stimulates foraging in  
246 goldfish (*Carassius auratus*) (Volkoff et al., 1999) and rats (Dube et al., 1999; Rodgers et al., 2000).  
247 Positive correlations between caloric demand and both orexin A and B exist for children (Tomasik et  
248 al., 2004). Observations of orexin A and B injected mice revealed no effect of orexin B on food intake,  
249 while orexin A increased food intake and metabolism (Lubkin and Stricker-Krongrad, 1998). One  
250 mechanism by which orexin can act on food intake is via regions in the brain as the arcuate nucleus  
251 (ARC) (Rodgers et al., 2002), where also leptin influences energetic processes in the body. It has also  
252 been suggested that foraging activity is increased by delaying satiety, as shown for low dose  
253 treatments in rats (Rodgers et al., 2000). Effects not related to feeding include a general arousal,  
254 reduced pain perception, increased locomotion etc. (Rodgers et al., 2002), and many of these can be  
255 seen as enabling for foraging. Despite of both orexins being present in a variety of organisms, the  
256 effect of orexin A on feeding behaviour seems to be much stronger than that of orexin B (Edwards et  
257 al., 1999; Haynes et al., 1999; Nakamachi et al., 2006; Sakurai et al., 1998).

258 *Stimuli* Factors influencing the secretion of orexin describe the body's current state in terms of  
259 energy availability. A stimulating factor reported for rats is the fall in plasma glucose levels,  
260 eventually in combination with an empty stomach (Cai et al., 2002; Cai et al., 1999). However, a study  
261 on rats with insulin-induced fall in plasma glucose only showed an increase in hypothalamic orexin B

262 (Cai et al., 2001). When energy is available to the organism, orexin secretion is inhibited. A signal of  
263 ingested food can be gastric distension (Cai et al., 1999). Leptin receptors have been found linked to  
264 orexin neurons in rodents and primates (Horvath et al., 1999) and may decrease the secretion of  
265 orexin in the hypothalamus (Kalra et al., 1999). Orexin A is believed to be part of a short-term  
266 response to ensure energy balance in the body (Cai et al., 1999; Rodgers et al., 2002).

267 Orexin effects in fish are similar to those in mammals (Matsuda et al., 2012) and they have been  
268 detected in several fish species (Miura et al., 2007; Nakamachi et al., 2006; Volkoff et al., 2003). Most  
269 experiments are done on goldfish (Penney and Volkoff, 2014), but also cavefish (*Astyanax fasciatus*  
270 *mexicanus*) show an increase of orexin A in relation to food intake (Penney and Volkoff, 2014). An  
271 interplay between orexin and ghrelin is suggested for foraging initialisation, in which ghrelin  
272 stimulates food intake and mediates orexin effects (Miura et al., 2007; Penney and Volkoff, 2014).  
273 Ghrelin is known from several fish species (Matsuda et al., 2011). In mammals, an increase in ghrelin-  
274 concentrations can be observed before food intake (Müller et al., 2015). In fish, it seems that  
275 patterns in ghrelin secretion are more species-specific. Several species show increases, as in  
276 mammals, but also decreasing concentrations are found (Jönsson, 2013; Penney and Volkoff, 2014;  
277 Rønnestad et al., 2017). Despite of differing mechanisms, it seems that the positive effect of ghrelin  
278 on foraging is similar across fish species.

#### 279 *The Thyroid Function (THF)*

280 *Effects* In mammals and fish, thyroid hormones (TH) are major factors regulating metabolism and  
281 development. The hormones affect brain development (Di Liegro, 2008), metamorphosis (Youson et  
282 al., 1994) and, in combination with growth hormone, bone growth (Nilsson et al., 2005; Robson et al.,  
283 2002). Throughout life the basal metabolic rate is regulated by TH (Heilbronn et al., 2006; Herwig et  
284 al., 2008; Kitano et al., 2010; Webb, 2004). Due to their effect on metabolism they also play an  
285 important role in preparing organisms for seasons of low temperature and food availability (e.g. in  
286 red deer (*Cervus elaphus*) (Kuba et al., 2015), red knot (*Calidris canutus canutus*) (Jenni-Eiermann et  
287 al., 2002), reindeer (Bubenik et al., 1998) and white grouper (*Epinephelus aeneus*) (Abbas et al.,  
288 2012)). Consequently, some seasonal variation in circulating hormone levels can be detected. A  
289 reduction of up to 30% in basal metabolic rate in the absence of TH is documented for endotherms,  
290 and this reduction can be linked to thermogenesis (Heilbronn et al., 2006; Mullur et al., 2014; Silva,  
291 2003). Non-thermogenic effects include the regulation of body weight and metabolism of  
292 triglycerides and carbohydrates (Mullur et al., 2014; Varghese and Oommen, 1999; Varghese et al.,  
293 2001). In both mammals and fish an impact on cardiac output is documented (Carr and Kranias, 2002;  
294 Little and Seebacher, 2014), and effects of TH on resting hearts has been shown in zebrafish (*Danio*  
295 *rerio*) (Little and Seebacher, 2014). As cardiac output contributes to maintain aerobic scope, TH also  
296 impacts the animal's ability to sustain sufficient oxygen uptake under changing temperatures (Little  
297 and Seebacher, 2014).

298 *Axis* TH secretion depends on a hormone cascade sustaining relatively constant circulating hormone  
299 levels. On environmental or peripheral stimulation, thyroid releasing hormone (TRH) is secreted by  
300 neurons in the hypothalamus. In mammals, it promotes thyroid-stimulating hormone (TSH) release  
301 from the pituitary. In fish, the relation between TRH and TSH is not as clearly defined (Abbott and  
302 Volkoff, 2011; Chatterjee et al., 2001). In both mammals and fish, TSH acts on the thyroid gland, the  
303 actual place of TH production, which is stimulated to release TH into the blood. Those are mainly



304 thyroxine ( $T_4$ ) but also triiodothyronine ( $T_3$ ), which differ in the number of their iodide ions (Han et  
305 al., 2004; Zoeller et al., 2007). Relatively constant hormone levels in the body are accomplished by  
306 negative feedbacks in the hormone cascade (Fekete and Lechan, 2014; Zoeller et al., 2007). TH are  
307 mainly eliminated from the blood by deiodination in the liver (Malik and Hodgson, 2002; Zoeller et  
308 al., 2007). The first deiodination-process forms the bioactive  $T_3$  from  $T_4$ . There is also some evidence  
309 on the direct effect of TRH on feeding and locomotor activity (Abbott and Volkoff, 2011).

310 Target tissues, such as the brain, bones, and kidneys, contain different kinds of metabolic enzymes,  
311 deiodinases, to remove iodide from the hormones (Friesema et al., 1999; Miura et al., 2002).  
312 Biological inactive  $T_4$  has to be converted to  $T_3$  in order to have an effect on tissues (Zoeller et al.,  
313 2007). There are three deiodinases, which successively can remove iodide ions to form  $T_3$ ,  $T_2$ , and  $T_1$ .  
314 An inactive form called reverse $T_3$  can also be produced (Zoeller et al., 2007). Although it seems that  
315 most studies concern the actions of  $T_3$ , there is some evidence on effects of  $T_2$  (Lanni et al., 2001) and  
316  $T_4$  (Robson et al., 2002).

317 *Stimuli* Several factors stimulating the release of TH have been identified, e.g. leptin (Abel et al.,  
318 2001; Herwig et al., 2008; Nilni et al., 2000) and insulin (Lartey et al., 2015). Leptin transfers  
319 information based on individual fat stores to the brain (Cammisotto and Bendayan, 2007), where the  
320 signal influences secretion of TRH positively (Fekete and Lechan, 2014). Inhibiting effects are known  
321 from stress (Silberman et al., 2002), exhaustive exercise (Hackney and Dobridge, 2009), and  
322 melatonin (Ikegami and Yoshimura, 2013; Ono et al., 2008).

### 323 *Model Implementation*

324 *GHF*: As our interest is in hormone strategies for growth, the growth hormone cascade is reduced to  
325 one variable in the model. This is a proxy for a fish's IGF-1 blood plasma concentration and regulates  
326 the amount of energy drained from reserves and used for building all kinds of somatic structures,  
327 including bones. The complex hormonal network of ghrelin, leptin and the somatotrophic axis is  
328 resembled in the interaction of GH and current body states, notably energy reserves and satiety. In  
329 the model the axis, its effects, and stimuli are referred to as the growth hormone function (GHF)  
330 (Eales, 1988).

331 *OXF*: The orexin function (OXF) represents stimuli, hormone secretion, and effects of orexin as one  
332 value. For the model, only orexin A is regarded. To simplify its effects, the OXF only affects foraging  
333 behaviour in a positive manner. Foraging is assumed to include a series of other effects, such as  
334 arousal and increased locomotion, and in the model these are reflected in energetic foraging costs.  
335 Motivated from behavioural ecology, there comes a mortality cost with increasing foraging activity as  
336 looking for food involves potential encounters with predators. In the model we consider the longer  
337 term effect of the orexin function as a proxy for the mean orexin A concentration in the body during  
338 this period of time. Neither the effect of leptin nor ghrelin are modelled directly, but are integrated  
339 in the OXF hormonal mechanism.

340 *THF*: For the purpose of the model, a long-term effect of TH is of interest. Stress from predation,  
341 insulin and other factors that signal environmental or individual conditions on a short timescale are  
342 hence neglected. In the model the thyroid cascade is reduced to a simple factor resembling blood  
343 concentrations of bioactive  $T_3$ . Negative feedbacks and elimination in order to receive relatively  
344 constant concentrations of TH in the body are disregarded; this is also done for the minor effect of  $T_2$

345 and  $T_4$ . Effects of TH are reduced to an influence of thyroid on metabolism. Metabolism is regarded  
346 as the mean turnover of energy from food to reserves, soma, or activities. The influence of TH on  
347 metabolic mechanisms in the model is summarized in a positive linear correlation between TH  
348 concentration and standard metabolic rate (SMR). While this correlation is regarded as the cost of  
349 TH, a benefit comes with the positive linear correlation between TH and potential oxygen uptake, for  
350 example partly mediated through heart function. Increases in potential oxygen uptake through TH  
351 result in a greater free aerobic scope, which in turn contributes to higher escape rates in case of a  
352 predator attack. Non-metabolic processes as brain development or metamorphosis are not part of  
353 the model or the model fish's life. As the "thyroid axis" in the model covers response to stimuli, the  
354 hormones themselves and their effects, it is called Thyroid hormone function (THF) (Eales, 1988).

## 355 Model description

356 Hormones regulate physiological and behavioural processes, and these in turn achieve benefits and  
357 incur costs that may depend on the environmental conditions and the state of the organism. When  
358 we say we model hormones, it is therefore the *effects* of hormones that are in focus, in our case their  
359 consequences for growth and survival of juvenile fish. We first give the four central equations that  
360 describe growth and survival in our model, then detail the underlying processes. Throughout, capital  
361 letters are used for array variables that describe the organism and may change over time or with  
362 state, while lowercase is used for parameters that have a specific value (listed in Table 1). Greek  
363 letters denote the strategies, i.e. the hormone levels that the model optimizes.

364 The model characterizes fish body mass  $W$  [g] as being separated into two components, where the  
365 structural body mass  $W_{\text{structure}}$  [g] grows irreversibly. On top of that are the energy reserves  $R$  [J]  
366 that can be built or tapped, having an energy density  $d_{\text{reserves}}$  [ $\text{J g}^{-1}$ ]:

$$367 \quad W = W_{\text{structure}} + \frac{R}{d_{\text{reserves}}}. \quad (\text{Eqn 1})$$

368 Growth  $\Delta W_{\text{structure}}$  [ $\text{g week}^{-1}$ ], the irreversible increase in structural body mass, depends on the level  
369  $\gamma$  [ $\text{ng ml}^{-1}$ ] of the growth hormone function (GHF) relative to its maximum value  $\gamma_{\text{max}}$  [ $\text{ng ml}^{-1}$ ],  
370 current structural weight, and  $k_{\text{growth}}$  [ $\text{week}^{-1}$ ], which sets the upper limit for proportional increase  
371 in structural body mass per time step (weeks):

$$372 \quad \Delta W_{\text{structure}} = \frac{\gamma}{\gamma_{\text{max}}} \cdot k_{\text{growth}} \cdot W_{\text{structure}}. \quad (\text{Eqn 2})$$

373 From the bioenergetics budget it follows that all energy taken up as food  $I$  [ $\text{J min}^{-1}$ ] is used for either  
374 metabolic processes  $P$  [ $\text{J min}^{-1}$ ] or to pay energetic costs of building tissues  $C$  [ $\text{J min}^{-1}$ ]. These new  
375 tissues include both new soma and changes in reserves.

$$376 \quad I = P + C. \quad (\text{Eqn 3})$$

377 The details of  $I$ ,  $P$ , and  $C$  are described in detail further down. Hormonally,  $I$  is controlled by the  
378 OXF,  $C$  by the GHF through tissue costs of growth, and  $P$  is influenced by the extra metabolic costs of  
379 expressing the THF.

380 The last central equation relates to survival probability  $S$  [ $\text{year}^{-1}$ ], which is given by  $S = e^{-M/52}$   
381 where  $M$  [ $\text{year}^{-1}$ ] is the total mortality rate compounded by several components:

$$382 \quad M = m_{\text{fixed}} + M_{\text{size}} + M_{\text{foraging}} + M_{\text{scope}} + M_{\text{foraging} \times \text{scope}}. \quad (\text{Eqn 4})$$

383 Here  $m_{\text{fixed}}$  is a constant irrespective of size, state, or strategy.  $M_{\text{size}}$  is a predation rate that declines  
384 with size.  $M_{\text{foraging}}$  is predation resulting from exposure while foraging.  $M_{\text{scope}}$  is increased  
385 vulnerability when the individual's overall metabolic rate is close to its maximum aerobic capacity,  
386 because it is then harder to escape an attack. Similarly,  $M_{\text{foraging} \times \text{scope}}$  is extra mortality when the  
387 individual exposes itself to predators while it is exhausted, which would put it in double jeopardy.  
388 The thyroid hormone function affects both  $M_{\text{scope}}$  and  $M_{\text{foraging} \times \text{scope}}$ .

389 Understanding the model requires that the equations above are interpreted in light of three key  
390 trade-offs that we describe here and give details and equations for further down.

391 First, the energy requirement of growth and everything else has to be met by foraging for food,  
392 which involves taking some level of extra risk (Krause and Godin, 1996; Lima and Dill, 1990; Sih,  
393 1992). A resting fish often seeks safety in a shelter but needs to leave this to seek habitats where  
394 prey, and most often predators, are more common. Acquisition of more food thus involves more  
395 encounters with predators, and when food is scarce the fish needs to search for longer and expose  
396 itself more to forage the same amount.

397 Second, aquatic breathing is rapidly limited by surface-to-volume ratios and gas diffusion, even for  
398 small organisms. Although respiratory organs such as gills have evolved to overcome these  
399 constraints, there are physical limits to permissible total metabolic rate (Priede, 1985). Maximum  
400 aerobic capacity is often measured on fish that swim in respirometers, but digestion and growth are  
401 also variable processes that contribute to total metabolic rate. When the overall level of metabolic  
402 processes requires a lot of oxygen, the fish is quickly exhausted and therefore less efficient at  
403 evading predators should it encounter one.

404 Third, a trade-off that has received less attention is how spending energy can help an organism to  
405 manage, mitigate, or reduce risk. It is known that immune systems incur energetic costs, and that the  
406 optimal level of immune function depends on energetic status, the risk of infections, and availability  
407 of resources. Here we use thyroid regulation of metabolic level to achieve a similar exchange  
408 between energy and risk. The model assumes metabolic level can be upregulated by thyroid at an  
409 energetic cost (subject to trade-off 1), and the extra metabolic capacity is modelled as an elevated  
410 aerobic scope (alleviating trade-off 2). Consequently, the model allows metabolic rate to vary  
411 systematically between ecological settings.

412 We use a state-dependent model to find the optimal hormonal control of acquisition and allocation  
413 of energy. This type of mechanistic model finds the evolutionary endpoint (beyond which further  
414 changes cannot improve fitness) for a given environment. The model first uses dynamic programming  
415 (Clark and Mangel, 2000; Houston and McNamara, 1999) to find the optimal hormone expression,  
416 the strategy, for each combination of the individual's states. The individual states included are the  
417 body length of the fish and its energy reserves. Thereafter, an individual that makes use of the  
418 optimal strategy according to its current individual state is simulated. We record its trajectory of  
419 growth, physiology, behaviour, and risk-taking to quantify and analyse effects. The model optimizes  
420 the state-dependent trajectory of the three hormones (GHF, OXF, and THF) by maximizing juvenile  
421 survival between 10 cm and 30 cm body length. The time steps are set to one week to represent  
422 typical dynamics of hormone levels and growth processes, which means that more rapid processes  
423 like behaviours are not modelled in minute-to-minute detail but for their cumulative effects at a  
424 weekly scale. The model describes growth of a juvenile fish in environments with constant food  
425 availability, and we compare several different environments in our analyses.

## 426 **Energy budgets and metabolic rate**

427 The total metabolic rate  $P$  [ $\text{J min}^{-1}$ ] is the sum of all respiratory processes, all with unit joules:

$$428 \quad P = P_{\text{SMR}} + P_{\text{foraging}} + P_{\text{SDA}} + P_{\text{reserves}} + P_{\text{growth}} \cdot \quad (\text{Eqn 5})$$

429 Here  $P_{\text{SMR}}$  [ $\text{J min}^{-1}$ ] is the standard metabolic rate,  $P_{\text{foraging}}$  [ $\text{J min}^{-1}$ ] the swimming cost of foraging  
430 behaviour,  $P_{\text{SDA}}$  [ $\text{J min}^{-1}$ ] the cost of digestion and energy uptake (SDA) until the resources are  
431 available in the bloodstream, and  $P_{\text{reserves}}$  [ $\text{J min}^{-1}$ ] and  $P_{\text{growth}}$  [ $\text{J min}^{-1}$ ] the metabolic costs of  
432 converting between resources in the bloodstream and reserve and structural tissue, respectively.

433 On top of that, the organism uses its digested resources for incorporation as new structural tissue  
434 ( $C_{\text{growth}}$  [J]) or by adding to or using from energy reserves ( $\Delta R$  [J]). The net rate  $C$  [ $\text{J min}^{-1}$ ] of such  
435 incorporation of energy into tissue is thus:

$$436 \quad C = (C_{\text{growth}} + \Delta R) / k_{\text{MinutesPerWeek}} \quad (\text{Eqn 6})$$

437 Note that while  $P$  and  $C$  both contribute to the individual's energy budget (Eqn 3), only  $P$  uses  
438 oxygen through aerobic respiration (Eqn 24).

439 The basis, standard metabolic rate (SMR), scales allometrically with body mass as the fish grow from  
440 juvenile to adult size. Other contributors to an individual's overall metabolic rate are factors like  
441 locomotion, digestion, and growth, and many of these may change with ontogeny (Mozsar et al.,  
442 2015).

443 The model uses variants of SMR in several ways. For what is measured experimentally as SMR and  
444 that we refer to as  $P_{\text{SMR}}$  is the standard oxygen consumption of the organism's total body mass as it  
445 is affected by the level of the thyroid hormone function. The standard level of SMR at a mean level of  
446 THF expression is:

$$447 \quad P_{\text{standard}} = k_{\text{SMR}} \cdot W^a, \quad (\text{Eqn 7})$$

448 Where  $k_{\text{SMR}}$  has unit [ $\text{J min}^{-1} \text{g}^{-a}$ ].  $P_{\text{standard}}$  can be up- or downregulated under the influence of THF,  
449 modelled as the concentration  $\tau$  [ $\text{ng l}^{-1}$ ] and relatively to a maximum concentration  $\tau_{\text{max}}$  [ $\text{ng ml}^{-1}$ ]:

$$450 \quad P_{\text{SMR}} = \left[ 1 + \left( \frac{\tau}{\tau_{\text{max}}} - 0.5 \right) \cdot k_{\text{THF\_SMR}} \right] \cdot P_{\text{standard}} \cdot \quad (\text{Eqn 8})$$

451 Here  $k_{\text{THF\_SMR}}$  determines the strength of the effect of THF on metabolic rate, or in other words, the  
452 energetic cost of upregulating the scope for metabolic activity. It is  $P_{\text{SMR}}$  that enters the individual's  
453 metabolic rate (Eqn 5).

454 When we model food intake as a multiple of SMR, it is unlikely that a chubby individual has higher  
455 foraging success per time and energy investment compared to a leaner fish, so we scale food intake  
456 with  $P_{\text{structure}}$ , a measure of SMR calculated from the lean body mass only and not affected by THF:

$$457 \quad P_{\text{structure}} = k_{\text{SMR}} \cdot (W_{\text{structure}}^a) \cdot \quad (\text{Eqn 9})$$

## 458 **Foraging and digestion**

459 Energy from foraging is ultimately used to drive all energy-dependent processes in the organism. We  
460 model foraging as controlled by appetite through the orexin function where the relative  
461 concentration of OXF ( $\frac{\alpha}{\alpha_{\text{max}}}$ ) is proportional to the target intake rate  $I$  of the individual.

$$462 \quad I = \frac{\alpha}{\alpha_{\max}} \cdot k_{\text{OxF}} \cdot P_{\text{structure}} \cdot \quad (\text{Eqn 10})$$

463 Intake  $I$  [ $\text{J min}^{-1}$ ] is defined as metabolizable energy absorbed by the gut; urinary and fecal loss of  
464 energy are implicitly included in the dimensionless coefficient  $k_{\text{OxF}}$  (Bureau et al., 2003). Here  
465  $P_{\text{structure}}$  is a standardized metabolic rate of the lean body mass, explained in Eqn 9 above, used  
466 because it is unrealistic that having large reserves contributes to more efficient foraging.

467 The foraging behaviour  $B_{\text{foraging}}$  [dimensionless, given in multiples of  $P_{\text{structure}}$ ] required to meet  
468 the energetic demand depends on food availability in the environment. We first rescale foraging  
469 intake to multiples of SMR and then assume that food is quicker and safer to find in rich food  
470 environments  $E$  [dimensionless]:

$$471 \quad B_{\text{foraging}} = \frac{I}{P_{\text{structure}} \cdot E} \cdot \quad (\text{Eqn 11})$$

472 The cost of foraging activity ( $P_{\text{behaviour}}$ ) is proportional to foraging activity and SMR with a  
473 coefficient  $k_{\text{foraging}}$  [dimensionless]. Physical activity during foraging requires moving the whole  
474 body, including soma and reserves, so SMR is based on total weight.

$$475 \quad P_{\text{foraging}} = k_{\text{foraging}} \cdot B_{\text{foraging}} \cdot P_{\text{standard}} \cdot \quad (\text{Eqn 12})$$

476 Food eaten is processed by the digestive system and taken up into the bloodstream. Specific dynamic  
477 action SDA ( $P_{\text{SDA}}$ ), representing the cost of digestion, is the product of intake and a constant  $k_{\text{SDA}}$   
478 [dimensionless].

$$479 \quad P_{\text{SDA}} = k_{\text{SDA}} \cdot I \cdot \quad (\text{Eqn 13})$$

## 480 **Growth and reserves**

481 Structural weight ( $W_{\text{structure}}$ ) is calculated based on length  $L$  [cm] using Fulton's condition factor for  
482 lean fish ( $k_{\text{Fultons\_min}}$ , [ $\text{g cm}^{-1}$ ])

$$483 \quad W_{\text{structure}} = k_{\text{Fultons\_min}} \cdot L^3 \cdot \quad (\text{Eqn 14})$$

484 Likewise, maximum storage depends on body size and is calculated from the difference between  
485 maximum ( $k_{\text{Fultons\_max}}$ , [ $\text{g cm}^{-1}$ ]) and lean condition factor, and the energy density of the reserves  
486 ( $d_{\text{reserves}}$ , [ $\text{J g}^{-1}$ ]):

$$487 \quad R_{\text{max}} = d_{\text{reserves}} \cdot (k_{\text{Fultons\_max}} - k_{\text{Fultons\_min}}) \cdot L^3 \cdot \quad (\text{Eqn 15})$$

488 The cost of structural growth  $C_{\text{growth}}$  follows directly from the amount of new tissue produced (Eqn  
489 2) and the somatic energy density  $d_{\text{structure}}$  [ $\text{J g}^{-1}$ ]:

$$490 \quad C_{\text{growth}} = \Delta W_{\text{structure}} \cdot d_{\text{structure}} \cdot \quad (\text{Eqn 16})$$

491 While reserves may vary in size, the model assumes that structural growth is irreversible ( $C_{\text{growth}} \geq$   
492 0). A breakdown of soma, e.g. muscle tissue during starvation as seen in nature, is thus restricted to  
493 the part included in the reserves.

494 To meet the requirements of different tissues, nutrients have to be converted, and conversion of  
495 metabolites comes with a cost. When storing energy, processing of nutrients into storage molecules  
496 is based on a conversion efficiency  $k_{\text{conversion\_reserves}}$  [dimensionless]. The model assumes this  
497 conversion to be biochemical processes that requires oxygen and therefore will contribute to overall  
498 metabolic rate:

499  $P_{\text{reserves}} = \Delta R(1 - k_{\text{conversion\_reserves}})/k_{\text{MinutesPerWeek}}$ , if  $\Delta R \geq 0$ . (Eqn 17)

500 If energetic expenses exceed the energy available from digestion, reserves have to be drained. Then  
501 a conversion cost has to be paid for making those reserves accessible:

502  $P_{\text{reserves}} = \frac{-\Delta R}{k_{\text{conversion\_reserves}}}(1 - k_{\text{conversion\_reserves}})/k_{\text{MinutesPerWeek}}$ , if  $\Delta R < 0$ . (Eqn 18)

503 In the case of growth, metabolites are drawn from reserves and converted into building blocks. The  
504 cost  $P_{\text{growth}}$  of conversion into growth is also calculated using a conversion efficiency parameter  
505  $k_{\text{conversion\_growth}}$  [dimensionless].

506  $P_{\text{growth}} = \frac{c_{\text{growth}}}{k_{\text{conversion\_growth}}}(1 - k_{\text{conversion\_growth}})/k_{\text{MinutesPerWeek}}$ . (Eqn 19)

## 507 **Aerobic scope**

508 The maximum rate of oxygen uptake has to accommodate all oxygen-dependent processes such as  
509 digestion, locomotion, foraging, conversion of energy, and other metabolic activities (Fry, 1971). We  
510 refer to the unused surplus as the free aerobic scope (Holt and Jørgensen, 2015).

511 We calculate potential oxygen uptake  $A_{\text{standard}}$  [ $\text{J min}^{-1}$ ] following Claireaux et al. (2000) as an  
512 allometric function with exponent  $b < 1$ . Because it is unrealistic that variations in reserve size affect  
513 an individual's capacity for oxygen uptake, we base calculations of aerobic scope on the structural  
514 body mass only:

515  $A_{\text{standard}} = k_{\text{scope}} \cdot (W_{\text{structure}}^b)$ . (Eqn 20)

516 Here  $k_{\text{scope}}$  has unit  $\text{J min}^{-1} \text{g}^{-b}$ .

517 A key assumption of our model is that the thyroid hormone function THF increases aerobic scope  
518 through increasing capacity for oxygen uptake, thus permitting higher levels of metabolic processes,  
519 but at a cost on SMR (Eqn 8):

520  $A_{\text{max}} = \left[1 + \left(\frac{\tau}{\tau_{\text{max}}} - 0.5\right) \cdot k_{\text{THF\_scope}}\right] \cdot A_{\text{standard}}$ . (Eqn 21)

521 Here  $k_{\text{THF\_scope}}$  [dimensionless] sets the strength of the effect of THF on increased scope.

## 522 **Food availability**

523 Across model runs we vary food availability, implemented as the factor  $E$  [dimensionless]. When  
524 food availability is good (high  $E$ ), less foraging activity is required to obtain the given amount of  
525 resources (Eqn 11). Contrary, when  $E$  is low, the individual needs more time to gather the amount of  
526 food it aims for. Consequently,  $E$ , through  $B_{\text{foraging}}$ , determines the exposure to predators in Eqn  
527 23, and the energetic cost of foraging in Eqn 12. In this version of the model, there is no stochasticity  
528 influencing foraging success.

## 529 **Mortality rates**

530 Mortality is decomposed into discrete risk factors (Eqn 4) that through separate trade-offs  
531 contribute to an individual's risk of being depredated or otherwise die (extended from Holt and  
532 Jørgensen (2014)). The first is a constant component  $m_{\text{fixed}}$  that represents death due to causes that  
533 are independent of the individual's state or behaviour, e.g. some types of disease. Second is size-  
534 dependent mortality, with reduced risk of mortality with larger body size, as is both observed  
535 (Gislason et al., 2010; Peterson and Wroblewski, 1984) and resulting from the size-structure of

536 marine food webs and scaling relationships (Brown et al., 2004). We model this as an allometric  
537 relationship with a negative exponent:

$$538 \quad M_{\text{size}} = m_{\text{size}} \cdot L^{x_{\text{size}}} . \quad (\text{Eqn 22})$$

539 The next mortality component reflects the well-known trade-off between risk of predation and  
540 foraging intensity (e.g., Lima, 1998). The model assumes that individuals expose themselves to  
541 predation risk while foraging, and that this risk accelerates with increasing foraging because the  
542 safest habitats and time periods are assumed exploited first:

$$543 \quad M_{\text{foraging}} = m_{\text{foraging}} \cdot M_{\text{size}} \cdot B_{\text{foraging}}^{x_{\text{foraging}}} . \quad (\text{Eqn 23})$$

544 For this and the risk components below, it is assumed that predation is the ultimate cause for death  
545 and therefore that the risk declines with size in the same way as the size-dependent predation  
546 mortality.

547 The final two components relate to oxygen use and aerobic scope, i.e. the difference between  
548 maximum oxygen uptake and actual rate of oxygen use. Fleeing from predators demands burst  
549 swimming, which is achieved anaerobically by white muscle (Johnston, 1981; Rome et al., 1988;  
550 Weber et al., 2016). Recovery is aerobic and faster if there is free aerobic scope to provide abundant  
551 oxygen (Killen et al., 2014; Marras et al., 2010), thus preparing the individual for a repeated attack or  
552 the next encounter. We model this based on the ratio between used and available oxygen, raised to  
553 a power to describe how predation risk increases rapidly as maximum oxygen uptake is approached  
554 or even temporarily exceeded:

$$555 \quad M_{\text{scope}} = m_{\text{scope}} \cdot M_{\text{size}} \cdot \left( \frac{P}{A_{\text{max}}} \right)^{x_{\text{scope}}} . \quad (\text{Eqn 24})$$

556 The model finally assumes that it is particularly risky for an individual to expose itself (high  $M_{\text{foraging}}$ )  
557 when oxygen use is high (high  $M_{\text{scope}}$ ) because attacks would be frequent and recovery at the same  
558 time slow:

$$559 \quad M_{\text{foraging} \times \text{scope}} = m_{\text{foraging} \times \text{scope}} \cdot M_{\text{foraging}} \cdot M_{\text{scope}} . \quad (\text{Eqn 25})$$

560 The mortality rates stemming from each risk factor are then summed (Eqn 4) and survival per time  
561 step given as  $S = e^{-M}$ .

## 562 **Implementation**

563 The model follows juvenile fish as they grow from 10 cm to 30 cm body length. Optimal solution is  
564 found for each combination of individual states length (21 steps) and reserves (10 steps).  
565 Discretization 160 steps for each hormone. Time step 1 week. Sufficient time horizon, normally 200  
566 weeks.

### 567 *Parameterization*

568 Parameters used in the model were chosen from different fish species to create a generalized,  
569 juvenile fish. Many of the studies used were performed on cod, which makes cod the fish most  
570 similar to the model fish.

571 For orexin A no studies on hormone concentrations in fish are known. In this case measurements on  
572 mammals were used.

573 The water temperature is constant at 5°C and water is saturated with oxygen.

574 Energy density for reserves is chosen to be 5 000 J/g. This is based on a calculation of mean protein  
575 and fat contents in storage tissues. A fish of 750 g serves as template. Energy density is based on the  
576 weight of liver and white muscle tissue and their proportional content of fat and proteins. For  
577 proteins, the weight of cellular water is taken into account.

578 Since growth requires development of more specialized tissue than storing molecules in reserves, the  
579 conversion efficiency for growth is lower than for reserves.

580 Fulton's condition factors for fish with full reserves ( $k_{\text{Fulton}_{\text{ns\_max}}}$ ) and depleted reserves were  
581 chosen following a study on cod (Lambert and Dutil, 1997b).

582 Variables used in calculations of SMR ( $k_{\text{SMR}}$ ,  $a$ ) are based on Clarke and Johnston (1999), Mozsar et  
583 al. (2015) and Pangle and Sutton (2005) accounting for the resting metabolic rate of a general teleost  
584 fish. In line with earlier models built on a similar bioenergetics template (e.g. Jørgensen and Fiksen  
585 2010), we use a scaling exponent  $a=0.7$  which is within the range of intraspecific scaling exponents  
586 for in teleosts (Killen et al., 2007). Also, studies show that there is a great variation for scaling  
587 exponents in animals and the value chosen here is in the range of this variation (Holdway and  
588 Beamish, 1984; Kjesbu et al., 1991; Lambert and Dutil, 1997a). Units are converted to fit the model.

589 The coefficient  $k_{\text{scope}}$  used in calculations is derived from a study on cod (Claireaux et al., 2000). The  
590 scaling exponent for aerobic scope ( $b$ ) is chosen in accordance to SMR scaling (Holt and Jørgensen,  
591 2014).

#### 592 *Hormone Concentrations*

593 Concentrations of IGF-1 are given in ng/ml blood plasma and range from 0 to 200. In experiments  
594 with tilapia concentrations of 70 – 120 ng/ml plasma were measured (Uchida et al., 2003). A study on  
595 Arctic char revealed concentration up to approximately 250 ng/ml plasma (Cameron et al., 2007).

596 Orexin A has been detected in ranges up to roughly 350 pg/ml porcine blood plasma (Kaminski et al.,  
597 2013). A range assumed to be normal for adult men and women (Oka et al., 2004). The range is  
598 higher for children, where measurements up to roughly 1300 pg/ml have been observed (Tomasik et  
599 al., 2004). For the model orexin A adopts a range up to 2000 pg/ml blood plasma. Its existence and  
600 function in fish has mainly been documented in goldfish (Abbott and Volkoff, 2011; Hoskins et al.,  
601 2008; Volkoff et al., 1999) and zebrafish (Matsuda et al., 2012).

602 Concentrations of  $T_3$  are given in ng/ml of blood plasma and range from 0 to 5. The range is chosen  
603 according to measurements on teleosts like one-year old rainbow trout (*Oncorhynchus mykiss*)  
604 (Eales, 1988), *Anabas testudineus* (Varghese and Oommen, 1999; Varghese et al., 2001) and chum  
605 salmon (*Oncorhynchus keta*) (Tagawa et al., 1994) revealing concentrations up to roughly 4.5 ng/ml  
606 plasma for normal individuals.



## 607 Results

608 During the fish's growth phase, the optimal strategy for the hormone profile changes, resulting in a  
609 near-linear length growth and decreased mortality rate over time (Fig. 2). While energy gain and  
610 oxygen budgets are relatively stable per unit body mass, mortality decreases with size. The optimal  
611 level of GHF falls throughout the growth phase (Fig. 2A), but as their effect is relative to body size,  
612 the resulting growth in length is near-linear (Fig. 2D).

613 The optimal level of OXF (green) is relatively constant through the growth phase (Fig. 2B), which gives  
614 a stable food intake rate per body mass. Energy from feeding is allocated to SMR, SDA, soma,  
615 metabolic processes involved in conversion of food to reserves and growth, and the activity associate  
616 with searching for food (Fig. 2E). Since the food environment is not changing over time, the fish does  
617 not benefit from storing energy in reserves, but rather allocates all somatic investments in structural  
618 growth (Fig. 2E).

619 There is some variation seen in the levels of THF over the growth period for the fish (Fig. 2C). This  
620 variation is too small to have a visible effect on SMR or maximum oxygen uptake per metabolic mass  
621 (Fig. 2E & F). However, both SMR and maximum oxygen uptake for the individual increase due to  
622 increases in total body mass (not shown).

623 The instantaneous mortality rate decreases during development (Fig. 2G), mainly because size-  
624 dependent mortality (grey area, Fig. 2G) is smaller for larger fish (Eqn 22). Foraging mortality (Eqn  
625 23), scope-related (Eqn 24), and active-while-vulnerable mortality components (Eqn 25) also drop.  
626 Foraging activity and free scope are relatively constant, hence changes in these mortality  
627 components are mainly due to lower predation risk with increasing size.

628

629 If we study how the optimal hormone strategies change along an environmental gradient that varies  
630 in food availability, we see that the levels of OXF, GHF, and in particular THF are higher in  
631 environments with more abundant food (Fig. 3A). Individuals in rich food environments grow faster,  
632 and have higher oxygen-uptake and better survival probabilities. Faster juvenile growth requires  
633 increased energy intake, which results in higher SDA and conversion-related costs. Oxygen  
634 requirements also increase, which selects for higher THF levels that increases maximum oxygen  
635 uptake and secures free scope (Fig. 3C). THF also upregulates SMR, hence the optimal hormone level  
636 depends on the availability of energy in the environments and costs in terms of energy and mortality  
637 that come with gathering food. The energy allocation trade-off, between investments in  
638 maintenance and survival on the one hand, and growth on the other, changes with food availability.  
639 Throughout the growth phase this trade-off is influenced by THF, deducting energy to support a  
640 higher metabolic rate that in turn increases escapement probability from predators. As energy is  
641 more accessible when food abundance is higher, activity costs are unchanged even when intake  
642 increases (Fig. 3B). Due to higher hormone levels, fish in habitats with high food availability have  
643 higher growth rates, intake, and SMR (Fig. 3).

644 Comparing oxygen budgets (Fig. 3B), we see a slight increase in free scope from the poorest to the  
645 richest food environment. THF enables the organism to increase its free scope despite higher oxygen  
646 use, thus permitting higher growth and foraging through the other hormones. Oxygen used for

647 preparing metabolites for new soma reduces free scope, while THF works against this process by  
648 elevating maximum oxygen uptake.

649 Simplified, GHF sets energetic needs, OXF meets the needs by determining foraging activity and  
650 providing metabolites for growth. The increased energy turnover has to be supported by THF,  
651 regulating maximum oxygen uptake to reduce mortality rate when energy is readily accessible and  
652 high turnover desirable (Fig. 3D).

653 Adaptations in hormone levels cause fish in rich environments to have a shorter juvenile phase (Fig.  
654 3E). Despite similar instantaneous mortality rates (Fig. 3D), the probability of surviving to the end of  
655 the growth phase differs substantially between food environments because the duration of the  
656 growth phase is longer when food is scarcer.

## 657 Discussion

658 Most evolutionary optimization models of animal growth and survival focus on behaviour, size, or  
659 other phenotypic traits while the internal regulatory processes are often ignored (Fawcett et al.,  
660 2014; Grafen, 1984). For fish, this includes social behaviour (Rountree and Sedberry, 2009; van der  
661 Post and Semmann, 2011), diel vertical migration (Burrows, 1994), and habitat choice (Fiksen et al.,  
662 1995; Kirby et al., 2000), but see Salzman et al. (2018). Here we take the opposite perspective, and  
663 study optimal internal regulation by hormone systems for animals that cannot choose their external  
664 environment. Obviously, most animals can do both at the same time, and habitat selection can have  
665 direct impact on the physiological needs and priorities of the animal (Elton, 1927). But by removing  
666 the movement options in this model, we can isolate how internal mechanisms can be used to  
667 optimize trajectories of growth and mortality risk. We found variation in optimal hormone levels  
668 across different food environments and throughout ontogeny. We modelled adaptive evolution in  
669 three hormone functions, where the growth hormone function (GHF) sets the fitness-optimizing  
670 growth rate, the orexin function (OXF) provides the required resources through appetite control and  
671 foraging, while the thyroid hormone function (THF) adjusts trade-offs between bioenergetics and  
672 survival. The effects of the hormonal control are evident in growth patterns, energy allocation,  
673 oxygen budget, activity levels, and in survival.

674 Increased food availability enables organisms to grow faster, which is achieved by speeding up  
675 metabolism to accommodate increased physical and biochemical activity. Model fish adapted to high  
676 food availability by having higher optimal concentrations of GHF and THF than those adapted to  
677 food-restricted habitats (Fig. 3). Empirical studies testing for changes in hormone concentrations in  
678 relation to diet quantity focus on short-time experiments, often with feeding – starvation – refeeding  
679 cycles. Similar to the predictions of the model, these generally find a positive correlation between  
680 hormone concentrations in plasma and the amount of food eaten by the fish (Lescroart et al., 1998;  
681 MacKenzie et al., 1998; Power et al., 2000; Toguyeni et al., 1996; Van der Geyten et al., 1998) or  
682 mammal (Herwig et al., 2008; Lartey et al., 2015; Nillni, 2010). Adaptive regulation of growth  
683 processes is indicated by the often-observed positive relation between ration size and growth rate in  
684 short-time experiments, e.g. in tilapia (Dong et al., 2015; Fox et al., 2010; Toguyeni et al., 1996),  
685 white sturgeon (*Acipenser transmontanus*) (Cui et al., 1996), gilthead sea bream (*Sparus aurata*)  
686 (Bermejo-Nogales et al., 2011), cod (Berg and Albert, 2003) and polar cod (*Boreogadus saida*) (Hop et  
687 al., 1997). Food availability is suggested to be one of the most important environmental factors

688 influencing growth rates in fish (Dmitriew, 2011; Enberg et al., 2012; MacKenzie et al., 1998). We  
689 have not been able to find studies following hormone levels and growth rates of animals on  
690 differently sized rations throughout their growth phase.

691 Higher food availability in the model habitats results in higher optimal GHF levels and thus higher  
692 growth rates. Even if GHF in the model is a simplified version of the GH–IGF-1 axis, its response to  
693 stimuli like food availability resembles results from empirical studies. These studies show that  
694 concentrations of insulin-like growth factor-1 (IGF-1), a mediator of growth hormone (GH), decrease  
695 when food is less available (Bermejo-Nogales et al., 2011; Fox et al., 2010; Lescroart et al., 1998).  
696 Even though both GH and IGF-1 are essential for growth in natural individuals, growth rate typically  
697 exhibits positive correlations with IGF-1 but not with GH (see below). In addition to promoting  
698 growth in natural fish, GH has a lipolytic effect, amplifying the use of reserves during times of food  
699 restriction (Jönsson and Björnsson, 2002). In the model, we assume stable environments and thus  
700 conflate the multiple effects of GH to a single effect on growth, thus, the lipolytic effect of GH cannot  
701 arise as a GHF-effect but would need to be prescribed through explicit assumptions.

702 Increasing food availability in the environment triggers high growth rates via a combined effect of  
703 THF and GHF, although THF has no direct effect on growth in the model. Empirical studies account  
704 for the effect of hormones from both hormone axes on growth, which makes the emergent  
705 correlation in THF and GHF levels plausible. Somatic growth depends on several different processes,  
706 including bone and muscle growth, which in turn combine processes regulated by hormones such as  
707 T3 and IGF-1, from the two hormone functions. A study on tilapia documented a correlation between  
708 T3 and specific growth rates (Toguyeni et al., 1996). In mammals, T3 is involved in maintenance of  
709 chondrocytes and osteoblasts (Waung et al., 2012). It may have a direct effect on bone growth by  
710 local conversion and binding to thyroid receptors or an indirect effect via GH and IGF-1 (Nilsson et al.,  
711 2005). The interplay of TH and GH is also seen in chondrocyte development, in which a first phase is  
712 triggered by IGF-1 while the second phase depends on T3 (Robson et al., 2002). The GH dynamics  
713 follow the Dual Effector Theory, in which GH can act directly on cells or indirectly via IGF-1 (Jönsson  
714 and Björnsson, 2002). Despite their actions taking place at different locations in the bones or cells, or  
715 at different times during bone maturation, bones cannot grow if one of the hormones is missing. IGF-  
716 1 also plays an important role in muscle growth (Dai et al., 2015; Grossman et al., 1997), but to our  
717 knowledge effects of thyroid on muscle growth have not been documented.

718 Achieving high growth rates is always related to an increased demand for energy. This demand can  
719 be met by changes in energy acquisition and allocation, and in the model we see that energy  
720 acquisition is higher in environments where food is more accessible (Fig. 3). Optimally, roughly a  
721 third of intake is allocated directly to growth while the remainder is lost to other metabolic costs on  
722 the way (Fig. 3b). The calculated average for six different teleost fish allocating metabolizable energy  
723 to growth at maximum rations of food is at about 40% (Cui and Liu, 1990). Minimum and maximum  
724 allocation rates were 21.3% and 63.4%, respectively. Thus, the optimal allocation rate found in this  
725 model is within the observed range.

726 From a life history perspective one would expect a decrease in length growth as the individual gets  
727 larger, due to fewer potential predators for larger fish (Bystrom et al., 2015; Persson et al., 1996) and  
728 how the increased survival prospects lead to slower optimal growth that put more weight on survival  
729 and the future. However, larger fish are more efficient feeders because they are less exposed to risk

730 when they are foraging (Claireaux et al., 2018), countering the first effect. These two opposing forces  
731 explain the rather linear growth seen in the predicted juvenile growth from this model, an  
732 observation also seen in other adaptive models for the ontogeny of growth when acquisition is  
733 flexible (Claireaux et al., 2018; Jørgensen and Holt, 2013).

734 The challenges for the internal regulation mechanisms concerning storage of energy depend on the  
735 past, current, and expected food environment. In natural environments, this can include preparing  
736 for environmental change, by storing energy in reserves. In a stable food environment as in our  
737 model, building reserves is not necessary and because it involves costs it never becomes optimal, and  
738 there will be no variation in condition factor among individuals. A modelling approach analysing  
739 energy allocation in environments varying in food availability (Fischer et al., 2011) concluded that  
740 energy storage can be advantageous, but depends on the size of current reserves and how variable  
741 the environment is. An empirical study of more than 40 fish species or genera found that fish in  
742 stable habitats often have lower condition factors than fish in more unstable habitats (Fonseca and  
743 Cabral, 2007). This supports the fact that fish from the completely stable model environment have  
744 minimal reserves.

745 As preparation for foraging, orexin A pathways are activated when food gets scarce, while in the  
746 model impacts of OXF on intake are strongest in rich environments. In the model, we see a positive  
747 correlation between food availability and optimal OXF levels. Due to easily accessible energy in rich  
748 environments it is optimal to invest more into growth. This creates a higher energy demand in the  
749 model fish, which is met by increasing OXF levels and foraging activity. From empirical studies, orexin  
750 A is known to affect the individual's energy budget on a short-time scale. It is negatively correlated to  
751 leptin, which serves as a proxy for the amount of stored energy in adipose tissue. Food restriction  
752 can result in higher orexin mRNA production, orexin receptor and neuron activity (Rodgers et al.,  
753 2002). This is also the case for ghrelin, acting together with orexin to prepare for and initiate foraging  
754 (Matsuda et al., 2011; Miura et al., 2007). Under fasting conditions, ghrelin levels can increase  
755 (Iwakura et al., 2015; Jönsson, 2013). Despite of the trigger, low levels of stored energy, being the  
756 same in experiments and the model, the context in which the trigger occurs is different. This results  
757 in high levels of orexin A and OXF at different food abundances.

758 The shift described in our model cascades from endocrinal changes affecting energy allocation and  
759 acquisition, oxygen budgets, growth, and mortality risk, which in total causes a concerted response  
760 towards more rapid growth in rich food environments. Comparing poor to rich food environments,  
761 higher growth rates are supported by THF levels that upregulate SMR and increase maximum oxygen  
762 uptake. A positive correlation between metabolic rate and a range of traits contributing to rapid  
763 growth rate was found in Trinidadian guppies (*Poecilia reticulata*) (Auer et al., 2018), and this is also  
764 the case for our model fish.

765 Shorter growth periods with higher growth rates in rich food environments result in higher survival.  
766 Besides supporting growth, high GHF levels contribute to reducing size-dependent mortality by  
767 growing out of vulnerable size windows more quickly. High THF levels also lower mortality, by making  
768 escapement once predators are encountered more likely to be successful. Thus, total mortality  
769 experienced through the growth phase is lower and survival at the end of the growth phase  
770 increased. To our knowledge, only GH excretion has been linked to mortality in empirical studies. The  
771 special interest assigned to GH is probably due to husbandry in which several land-living and aquatic

772 animals have been genetically modified to excrete more GH and thus could grow faster to  
773 slaughtering size, e.g. coho salmon (*Oncorhynchus kisutch*) (Raven et al., 2008) and pig (Ju et al.,  
774 2015). Several studies have been conducted with both transgenic and hormone-implanted trout and  
775 coho salmon. Even if salmon fry can experience lower survival in the presence of predators  
776 (Sundström et al., 2005), several studies have found that fish treated with GH, thus having higher  
777 growth rates, have mortality rates similar to non-treated fish (Johnsson and Björnsson, 2001;  
778 Johnsson et al., 1999; Sundström and Devlin, 2011). In our model, these effects would come about  
779 because growth hormone increases the demand for food, and the resulting increase in appetite and  
780 foraging involves risk taking that elevates mortality rates.

781 The selection of fast-growing individuals over several generations also influences their  
782 endocrinology, as seen in salmon (Fleming et al., 2002). A better understanding of the combination  
783 of endocrinology and its consequences for growth is relevant also for animal breeding programs,  
784 including fish farming. Many physiological processes and traits are linked by the endocrinal network.  
785 Selecting on one of those traits will inevitably lead to changes in the endocrinal network and affect  
786 other traits. For example, selection for high growth rates could increase oxygen use in metabolic  
787 processes to a level where fish cannot sustain other metabolic processes simultaneously, something  
788 which can be described as a limited ability to multitask physiologically. This means that the majority  
789 of available oxygen is used for metabolic processes supporting growth, while little or no oxygen is left  
790 to assure free scope as is required for predator escape in the model. Other processes not modelled,  
791 like immune function, could suffer from constraints on oxygen uptake and use. A study on first-  
792 feeding salmon fry showed increases in mortality for GH-transgenic individuals under natural  
793 conditions (Sundström et al., 2004).

794 This model is a first step to combine internal and external control of appetite with energy allocation,  
795 growth and survival in teleost fishes. To reflect mechanisms in nature, McNamara and Houston  
796 (2009) argue that models should consist of complex environments and simplified organisms. In our  
797 case, the environment is simple while the animal model is complex. Even with this simple one-factor  
798 environment, we see a gradual change in optimal strategies for hormone expression and resulting in  
799 concerted trait differences between populations in poor and rich habitats. The model suggests an  
800 adaptive interplay of hormone functions, where GHF, OXF, and THF act together to cause an adaptive  
801 life history strategy that balances growth and survival throughout the juvenile phase. Often, effects  
802 of the internal control by means of hormones are studied in isolation from the selection pressure of  
803 the external environment. For the future, we suggest it is not sufficient to study only how hormones  
804 carry signals from tissues and sensory organs to control centres like the hypothalamus, or only how  
805 the control centre influences the decision processes in the body at many levels. Rather, there is a  
806 need to view the entire organisms as an evolved system, where key hormones mirror internal states  
807 and respond to external factors. Such decisions concern growth and survival, as in this study, but also  
808 other life history traits linked to maturation time or physiological preparations for maturation. It is  
809 this combination of emphasis on the endocrinal network in the model fish and its impacts on  
810 ultimate mechanisms as growth and survival that is characteristic of the model. It makes the model a  
811 tool for understanding processes and mechanisms underlying adaptations of growth. We think this is  
812 a fruitful path where many studies may follow.

## 813 Acknowledgements

814 The authors have benefited from discussions with Sergey Budaev, Bjørn-Cato Knutsen, Tom J.  
815 Langbehn, Marc Mangel, Adèle Mennerat and Ivar Rønnestad. No competing interests declared.

## 816 Funding

817 This research is supported by the University of Bergen and the Research Council of Norway  
818 [FRIMEDBIO 239834].

## 819 Data availability

820 Model code is accessible from the supplementary material, or by contacting JW.

## 821 References

- 822 **Abbas, H. H., Authman, M. M., Zaki, M. S. and Mohamed, G. F.** (2012).  
823 Effect of Seasonal Temperature Changes on Thyroid Structure and  
824 Hormones Secretion of White Grouper (*Epinephelus Aeneus*) in Suez Gulf,  
825 Egypt. *Life Science Journal-Acta Zhengzhou University Overseas Edition* **9**,  
826 700-705.
- 827 **Abbott, M. and Volkoff, H.** (2011). Thyrotropin Releasing Hormone  
828 (TRH) in goldfish (*Carassius auratus*): Role in the regulation of feeding and  
829 locomotor behaviors and interactions with the orexin system and cocaine-  
830 and amphetamine regulated transcript (CART). *Hormones and Behavior* **59**,  
831 236-245.
- 832 **Abel, E. D., Ahima, R. S., Boers, M. E., Elmquist, J. K. and Wondisford,**  
833 **F. E.** (2001). Critical role for thyroid hormone receptor beta 2 in the  
834 regulation of paraventricular thyrotropin-releasing hormone neurons.  
835 *Journal of Clinical Investigation* **107**, 1017-1023.
- 836 **Ali, M., Nicieza, A. and Wootton, R. J.** (2003). Compensatory growth in  
837 fishes: a response to growth depression. *Fish and Fisheries* **4**, 147-190.
- 838 **Andersen, B. S., Jørgensen, C., Eliassen, S. and Giske, J.** (2016). The  
839 proximate architecture for decision-making in fish. *Fish and Fisheries* **17**,  
840 680-695.
- 841 **Auer, S. K., Dick, C. A., Metcalfe, N. B. and Reznick, D. N.** (2018).  
842 Metabolic rate evolves rapidly and in parallel with the pace of life history.  
843 *Nature Communications* **9**, 6.
- 844 **Berg, E. and Albert, O. T.** (2003). Cod in fjords and coastal waters of  
845 North Norway: distribution and variation in length and maturity at age. *Ices*  
846 *Journal of Marine Science* **60**, 787-797.
- 847 **Bermejo-Nogales, A., Benedito-Palos, L., Calduch-Giner, J. A. and**  
848 **Perez-Sanchez, J.** (2011). Feed restriction up-regulates uncoupling protein

- 849 3 (UCP3) gene expression in heart and red muscle tissues of gilthead sea  
850 bream (*Sparus aurata* L.) New insights in substrate oxidation and energy  
851 expenditure. *Comparative Biochemistry and Physiology a-Molecular &*  
852 *Integrative Physiology* **159**, 296-302.
- 853 **Björnsson, B. T.** (1997). The biology of salmon growth hormone: from  
854 daylight to dominance. *Fish Physiology and Biochemistry* **17**, 9-24.
- 855 **Brown, J. H., Gillooly, J. F., Allen, A. P., Savage, V. M. and West, G. B.**  
856 (2004). Toward a metabolic theory of ecology. *Ecology* **85**, 1771-1789.
- 857 **Bubenik, G. A., Schams, D., White, R. G., Rowell, J., Blake, J. and**  
858 **Bartos, L.** (1998). Seasonal levels of metabolic hormones and substrates in  
859 male and female reindeer (*Rangifer tarandus*). *Comparative Biochemistry*  
860 *and Physiology C-Pharmacology Toxicology & Endocrinology* **120**, 307-315.
- 861 **Budaev, S., Jørgensen, C., Mangel, M., Eliassen, S. and Giske, J.** (2019).  
862 Decision-Making From the Animal Perspective: Bridging Ecology and  
863 Subjective Cognition. *Frontiers in Ecology and Evolution* **7**.
- 864 **Bureau, D. P., Kaushik, S. J. and Cho, C. Y.** (2003). 1 - Bioenergetics A2 -  
865 Halver, John E. In *Fish Nutrition (Third Edition)*, (ed. R. W. Hardy), pp. 1-59.  
866 San Diego: Academic Press.
- 867 **Burrows, M. T.** (1994). An optimal foraging and migration model for  
868 juvenile plaice. *Evolutionary Ecology* **8**, 125-149.
- 869 **Bystrom, P., Bergstrom, U., Hjalten, A., Stahl, S., Jonsson, D. and**  
870 **Olsson, J.** (2015). Declining coastal piscivore populations in the Baltic Sea:  
871 Where and when do sticklebacks matter? *Ambio* **44**, S462-S471.
- 872 **Cabello, G. and Wrutniak, C.** (1989). Thyroid-hormone and growth :  
873 relationships with growth hormone effects and regulation. *Reproduction*  
874 *Nutrition Development* **29**, 387-402.
- 875 **Cai, X. J., Evans, M. L., Lister, C. A., Leslie, R. A., Arch, J. R. S., Wilson, S.**  
876 **and Williams, G.** (2001). Hypoglycemia activates orexin neurons and  
877 selectively increases hypothalamic orexin-B levels - Responses inhibited by  
878 feeding and possibly mediated by the nucleus of the solitary tract. *Diabetes*  
879 **50**, 105-112.
- 880 **Cai, X. J., Liu, X. H., Evans, M., Clapham, J. C., Wilson, S., Arch, J. R. S.,**  
881 **Morris, R. and Williams, G.** (2002). Orexins and feeding: special occasions  
882 or everyday occurrence? *Regulatory Peptides* **104**, 1-9.
- 883 **Cai, X. J., Widdowson, P. S., Harrold, J., Wilson, S., Buckingham, R. E.,**  
884 **Arch, J. R. S., Tadayyon, M., Clapham, J. C., Wilding, J. and Williams, G.**  
885 (1999). Hypothalamic orexin expression - Modulation by blood glucose and  
886 feeding. *Diabetes* **48**, 2132-2137.
- 887 **Cameron, C., Moccia, R., Azevedo, P. A. and Leatherland, J. F.** (2007).  
888 Effect of diet and ration on the relationship between plasma GH and IGF-1  
889 concentrations in Arctic charr, *Salvelinus alpinus* (L.). *Aquaculture Research*  
890 **38**, 877-886.

- 891 **Cammisotto, P. G. and Bendayan, M.** (2007). Leptin secretion by white  
892 adipose tissue and gastric mucosa. *Histology and Histopathology* **22**, 199-  
893 210.
- 894 **Carr, A. N. and Kranias, E. G.** (2002). Thyroid hormone regulation of  
895 calcium cycling proteins. *Thyroid* **12**, 453-457.
- 896 **Chatterjee, A., Hsieh, Y. L. and Yu, J. Y. L.** (2001). Molecular cloning of  
897 cDNA encoding thyroid stimulating hormone beta subunit of bighead carp  
898 *Aristichthys nobilis* and regulation of its gene expression. *Molecular and*  
899 *Cellular Endocrinology* **174**, 1-9.
- 900 **Claireaux, G., Webber, D. M., Lagardere, J. P. and Kerr, S. R.** (2000).  
901 Influence of water temperature and oxygenation on the aerobic metabolic  
902 scope of Atlantic cod (*Gadus morhua*). *Journal of Sea Research* **44**, 257-265.
- 903 **Claireaux, M., Jørgensen, C. and Enberg, K.** (2018). Evolutionary effects  
904 of fishing gear on foraging behavior and life-history traits. *Ecology and*  
905 *Evolution* **8**, 10711-10721.
- 906 **Clark, C. W. and Mangel, M.** (2000). Dynamic State Variable Models in  
907 Ecology. Cary: Oxford University Press, USA.
- 908 **Clarke, A. and Johnston, N. M.** (1999). Scaling of metabolic rate with  
909 body mass and temperature in teleost fish. *Journal of Animal Ecology* **68**,  
910 893-905.
- 911 **Cui, Y., Hung, S. S. O. and Zhu, X.** (1996). Effect of ration and body size  
912 on the energy budget of juvenile white sturgeon. *Journal of Fish Biology* **49**,  
913 863-876.
- 914 **Cui, Y. and Liu, J. K.** (1990). Comparison of energy budget among six  
915 teleosts - III. Growth rate and energy budget. *Comparative Biochemistry and*  
916 *Physiology a-Physiology* **97**, 381-384.
- 917 **Dai, X. Y., Zhang, W., Zhuo, Z. J., He, J. Y. and Yin, Z.** (2015).  
918 Neuroendocrine regulation of somatic growth in fishes. *Science China-Life*  
919 *Sciences* **58**, 137-147.
- 920 **Dennett, D. C.** (2017). From bacteria to Bach and back : the evolution of  
921 minds. London: Allen Lane.
- 922 **Di Liegro, I.** (2008). Thyroid hormones and the central nervous system  
923 of mammals (Review). *Molecular Medicine Reports* **1**, 279-295.
- 924 **Dmitriew, C. M.** (2011). The evolution of growth trajectories: what limits  
925 growth rate? *Biological Reviews* **86**, 97-116.
- 926 **Dong, G. F., Yang, Y. O., Yao, F., Chen, L., Bu, F. Y., Li, P. C., Huang, F.**  
927 **and Yu, D. H.** (2015). Individual variations and interrelationships in  
928 feeding rate, growth rate, and spontaneous activity in hybrid tilapia  
929 (*Oreochromis niloticus* x *O. aureus*) at different feeding frequencies. *Journal*  
930 *of Applied Ichthyology* **31**, 349-354.



- 931 **Dube, M. G., Kalra, S. P. and Kalra, P. S.** (1999). Food intake elicited by  
932 central administration of orexins/hypocretins: identification of  
933 hypothalamic sites of action. *Brain Research* **842**, 473-477.
- 934 **Eales, J. G.** (1988). The Influence of Nutritional State on Thyroid Function  
935 in Various Vertebrates. *American Zoologist* **28**, 351-362.
- 936 **Edwards, C. M. B., Abusnana, S., Sunter, D., Murphy, K. G., Ghatel, M.**  
937 **A. and Bloom, S. R.** (1999). The effect of the orexins on food intake:  
938 comparison with neuropeptide Y, melanin-concentrating hormone and  
939 galanin. *Journal of Endocrinology* **160**, R7-R12.
- 940 **Elton, C. S.** (1927). Animal ecology. London: Sidgwick & Jackson.
- 941 **Enberg, K., Jørgensen, C., Dunlop, E. S., Varpe, Ø., Boukal, D. S.,**  
942 **Baulier, L., Eliassen, S. and Heino, M.** (2012). Fishing-induced evolution of  
943 growth: concepts, mechanisms and the empirical evidence. *Marine Ecology-*  
944 *an Evolutionary Perspective* **33**, 1-25.
- 945 **Facciolo, R. M., Crudo, M., Giusi, G. and Canonaco, M.** (2010).  
946 GABAergic influences on ORX receptor-dependent abnormal motor  
947 behaviors and neurodegenerative events in fish. *Toxicology and Applied*  
948 *Pharmacology* **243**, 77-86.
- 949 **Fawcett, T. W., Fallenstein, B., Higginson, A. D., Houston, A. I.,**  
950 **Mallpress, D. E. W., Trimmer, P. C. and McNamara, J. M.** (2014). The  
951 evolution of decision rules in complex environments. *Trends in Cognitive*  
952 *Sciences* **18**, 153-161.
- 953 **Fekete, C. and Lechan, R. M.** (2014). Central Regulation of  
954 Hypothalamic-Pituitary-Thyroid Axis Under Physiological and  
955 Pathophysiological Conditions. *Endocrine Reviews* **35**, 159-194.
- 956 **Fiksen, Ø., Giske, J. and Slagstad, D.** (1995). A spatially explicit fitness  
957 based model of capelin migrations in the barents sea. *Fisheries*  
958 *Oceanography* **4**, 193-208.
- 959 **Fischer, B., Dieckmann, U. and Taborsky, B.** (2011). WHEN TO STORE  
960 ENERGY IN A STOCHASTIC ENVIRONMENT. *Evolution* **65**, 1221-1232.
- 961 **Fisher, R. A.** (1930). Genetical theory of natural selection Oxford, U:  
962 Oxford University Press.
- 963 **Fleming, I. A., Agustsson, T., Finstad, B., Johnsson, J. I. and Björnsson,**  
964 **B. T.** (2002). Effects of domestication on growth physiology and  
965 endocrinology of Atlantic salmon (*Salmo salar*). *Canadian Journal of*  
966 *Fisheries and Aquatic Sciences* **59**, 1323-1330.
- 967 **Fonseca, V. F. and Cabral, H. N.** (2007). Are fish early growth and  
968 condition patterns related to life-history strategies? *Reviews in Fish Biology*  
969 *and Fisheries* **17**, 545-564.
- 970 **Fox, B. K., Breves, J. P., Davis, L. K., Pierce, A. L., Hirano, T. and Grau,**  
971 **E. G.** (2010). Tissue-specific regulation of the growth hormone/insulin-like  
972 growth factor axis during fasting and re-feeding: Importance of muscle

973 expression of IGF-I and IGF-II mRNA in the tilapia. *General and Comparative*  
974 *Endocrinology* **166**, 573-580.

975 **Friesema, E. C. H., Docter, R., Moerings, E., Stieger, B., Hagenbuch, B.,**  
976 **Meier, P. J., Krenning, E. P., Hennemann, G. and Visser, T. J.** (1999).  
977 Identification of thyroid hormone transporters. *Biochemical and Biophysical*  
978 *Research Communications* **254**, 497-501.

979 **Fry, F. E. J.** (1971). The effect of environmental factors on the physiology  
980 of fish. In *Fish Physiology* vol. 6 eds. W. S. Hoar and D. J. Randall), pp. 1-98:  
981 Academic Press.

982 **Gahete, M. D., Duran-Prado, M., Luque, R. M., Martinez-Fuentes, A. J.,**  
983 **Quintero, A., Gutierrez-Pascual, E., Cordoba-Chacon, J., Malagon, M. M.,**  
984 **Gracia-Navarro, F. and Castano, J. P.** (2009). Understanding the  
985 Multifactorial Control of Growth Hormone Release by Somatotropes  
986 Lessons from Comparative Endocrinology. In *Trends in Comparative*  
987 *Endocrinology and Neurobiology*, vol. 1163 eds. H. Vaudry E. W. Roubos G.  
988 M. Coast and M. Vallarino), pp. 137-153. Malden: Wiley-Blackwell.

989 **Garland, T., Zhao, M. and Saltzman, W.** (2016). Hormones and the  
990 Evolution of Complex Traits: Insights from Artificial Selection on Behavior.  
991 *Integrative and Comparative Biology* **56**, 207-224.

992 **Gatford, K. L., Egan, A. R., Clarke, I. J. and Owens, P. C.** (1998). Sexual  
993 dimorphism of the somatotrophic axis. *Journal of Endocrinology* **157**, 373-  
994 389.

995 **Giske, J., Eliassen, S., Fiksen, O., Jakobsen, P. J., Aksnes, D. L.,**  
996 **Jorgensen, C. and Mangel, M.** (2013). Effects of the Emotion System on  
997 Adaptive Behavior. *American Naturalist* **182**, 689-703.

998 **Gislason, H., Daan, N., Rice, J. C. and Pope, J. G.** (2010). Size, growth,  
999 temperature and the natural mortality of marine fish. *Fish and Fisheries* **11**,  
1000 149-158.

1001 **Grafen, A.** (1984). Natural selection, kin selection and group selection,  
1002 eds. K. JR and D. NB), pp. 62-84. Oxford: Blackwell Scientific Publications.

1003 **Grossman, E. J., Grindeland, R. E., Roy, R. R., Talmadge, R. J., Evans, J.**  
1004 **and Edgerton, V. R.** (1997). Growth hormone, IGF-I, and exercise effects on  
1005 non-weight-bearing fast muscles of hypophysectomized rats. *Journal of*  
1006 *Applied Physiology* **83**, 1522-1530.

1007 **Hackney, A. C. and Dobridge, J. D.** (2009). Thyroid hormones and the  
1008 interrelationship of cortisol and prolactin: influence of prolonged,  
1009 exhaustive exercise. *Endokrynologia Polska* **60**, 252-257.

1010 **Hamrick, M. W. and Ferrari, S. L.** (2008). Leptin and the sympathetic  
1011 connection of fat to bone. *Osteoporosis International* **19**, 905-912.

1012 **Han, Y. S., Liao, I. C., Tzeng, W. N. and Yu, J. Y. L.** (2004). Cloning of the  
1013 cDNA for thyroid stimulating hormone beta subunit and changes in activity

- 1014 of the pituitary-thyroid axis during silvering of the Japanese eel, *Anguilla*  
1015 *japonica*. *Journal of Molecular Endocrinology* **32**, 179-194.
- 1016 **Haynes, A. C., Jackson, B., Overend, P., Buckingham, R. E., Wilson, S.,**  
1017 **Tadayyon, M. and Arch, J. R. S.** (1999). Effects of single and chronic  
1018 intracerebroventricular administration of the orexins on feeding in the rat.  
1019 *Peptides* **20**, 1099-1105.
- 1020 **Heilbronn, L. K., de Jonge, L., Frisard, M. I. and et al.** (2006). Effect of  
1021 6-month calorie restriction on biomarkers of longevity, metabolic  
1022 adaptation, and oxidative stress in overweight individuals: A randomized  
1023 controlled trial. *JAMA* **295**, 1539-1548.
- 1024 **Herwig, A., Ross, A. W., Nilaweera, K. N., Morgan, P. J. and Barrett, P.**  
1025 (2008). Hypothalamic Thyroid Hormone in Energy Balance Regulation.  
1026 *Obesity Facts* **1**, 71-79.
- 1027 **Holdway, D. A. and Beamish, F. W. H.** (1984). Specific growth rate and  
1028 proximate body composition of atlantic cod (*Gadus morhua* L). *Journal of*  
1029 *Experimental Marine Biology and Ecology* **81**, 147-170.
- 1030 **Holt, R. E. and Jørgensen, C.** (2014). Climate warming causes life-history  
1031 evolution in a model for Atlantic cod (*Gadus morhua*). *Conservation*  
1032 *Physiology* **2**.
- 1033 **Holt, R. E. and Jørgensen, C.** (2015). Climate change in fish: effects of  
1034 respiratory constraints on optimal life history and behaviour. *Biology*  
1035 *Letters* **11**.
- 1036 **Hop, H., Tonn, W. M. and Welch, H. E.** (1997). Bioenergetics of Arctic  
1037 cod (*Boreogadus saida*) at low temperatures. *Canadian Journal of Fisheries*  
1038 *and Aquatic Sciences* **54**, 1772-1784.
- 1039 **Horvath, T. L., Diano, S. and van den Pol, A. N.** (1999). Synaptic  
1040 interaction between hypocretin (Orexin) and neuropeptide Y cells in the  
1041 rodent and primate hypothalamus: A novel circuit implicated in metabolic  
1042 and endocrine regulations. *Journal of Neuroscience* **19**, 1072-1087.
- 1043 **Hoskins, L. J., Xu, M. Y. and Volkoff, H.** (2008). Interactions between  
1044 gonadotropin-releasing hormone (GnRH) and orexin in the regulation of  
1045 feeding and reproduction in goldfish (*Carassius auratus*). *Hormones and*  
1046 *Behavior* **54**, 379-385.
- 1047 **Houston, A. I. and McNamara, J. M.** (1999). Models of Adaptive  
1048 Behaviour: An Approach Based on State. Cambridge, UK: Cambridge  
1049 University Press.
- 1050 **Ikegami, K. and Yoshimura, T.** (2013). Seasonal Time Measurement  
1051 During Reproduction. *The Journal of Reproduction and Development* **59**,  
1052 327-333.
- 1053 **Iwakura, H., Kangawa, K. and Nakao, K.** (2015). The regulation of  
1054 circulating ghrelin - with recent updates from cell-based assays. *Endocrine*  
1055 *Journal* **62**, 107-122.

- 1056 **Jenni-Eiermann, S., Jenni, L. and Piersma, T.** (2002). Temporal  
1057 uncoupling of thyroid hormones in Red Knots: T3 peaks in cold weather, T4  
1058 during moult. *Journal Fur Ornithologie* **143**, 331-340.
- 1059 **Johnsson, J. I. and Björnsson, B. T.** (2001). Growth-enhanced fish can be  
1060 competitive in the wild. *Functional Ecology* **15**, 654-659.
- 1061 **Johnsson, J. I., Petersson, E., Jönsson, E., Järvi, T. and Björnsson, B. T.**  
1062 (1999). Growth hormone-induced effects on mortality, energy status and  
1063 growth: a field study on Brown Trout (*Salmo trutta*). *Functional Ecology* **13**,  
1064 514-522.
- 1065 **Johnston, I. A.** (1981). Structure and function of fish muscle. *Symp Zool*  
1066 *Soc Lond* **48**, 71-113.
- 1067 **Ju, H. M., Zhang, J. Q., Bai, L. J., Mu, Y. L., Du, Y. T., Yang, W. X., Li, Y.,**  
1068 **Sheng, A. Z. and Li, K.** (2015). The transgenic cloned pig population with  
1069 integrated and controllable GH expression that has higher feed efficiency  
1070 and meat production. *Scientific Reports* **5**, 14.
- 1071 **Jönsson, E.** (2013). The role of ghrelin in energy balance regulation in  
1072 fish. *General and Comparative Endocrinology* **187**, 79-85.
- 1073 **Jönsson, E. and Björnsson, B. T.** (2002). Physiological functions of  
1074 growth hormone in fish with special reference to its influence on behaviour.  
1075 *Fisheries Science* **68**, 742-748.
- 1076 **Jørgensen, C. and Holt, R. E.** (2013). Natural mortality: Its ecology, how  
1077 it shapes fish life histories, and why it may be increased by fishing. *Journal*  
1078 *of Sea Research* **75**, 8-18.
- 1079 **Jørgensen, E. H. and Johnsen, H. K.** (2014). Rhythmic life of the Arctic  
1080 charr: Adaptations to life at the edge. *Marine Genomics* **14**, 71-81.
- 1081 **Kalamatianos, T., Markianos, M., Margetis, K., Bourlogiannis, F. and**  
1082 **Stranjalis, G.** (2014). Higher Orexin A levels in lumbar compared to  
1083 ventricular CSF: A study in idiopathic normal pressure hydrocephalus.  
1084 *Peptides* **51**, 1-3.
- 1085 **Kalra, S. P., Dube, M. G., Pu, S. Y., Xu, B., Horvath, T. L. and Kalra, P. S.**  
1086 (1999). Interacting appetite-regulating pathways in the hypothalamic  
1087 regulation of body weight. *Endocrine Reviews* **20**, 68-100.
- 1088 **Kaminski, T., Nitkiewicz, A. and Smolinska, N.** (2013). Changes in  
1089 plasma orexin A and orexin B concentrations during the estrous cycle of the  
1090 pig. *Peptides* **39**, 175-177.
- 1091 **Killen, S. S., Costa, I., Brown, J. A. and Gamperl, A. K.** (2007). Little left  
1092 in the tank: metabolic scaling in marine teleosts and its implications for  
1093 aerobic scope. *Proceedings of the Royal Society B-Biological Sciences* **274**,  
1094 431-438.
- 1095 **Killen, S. S., Mitchell, M. D., Rummer, J. L., Chivers, D. P., Ferrari, M. C.**  
1096 **O., Meekan, M. G. and McCormick, M. I.** (2014). Aerobic scope predicts

- 1097 dominance during early life in a tropical damselfish. *Functional Ecology* **28**,  
1098 1367-1376.
- 1099 **Kirby, D. S., Fiksen, O. and Hart, P. J. B.** (2000). A dynamic optimisation  
1100 model for the behaviour of tunas at ocean fronts. *Fisheries Oceanography* **9**,  
1101 328-342.
- 1102 **Kitano, J., Lema, S. C., Luckenbach, J. A., Mori, S., Kawagishi, Y.,**  
1103 **Kusakabe, M., Swanson, P. and Peichel, C. L.** (2010). Adaptive Divergence  
1104 in the Thyroid Hormone Signaling Pathway in the Stickleback Radiation.  
1105 *Current Biology* **20**, 2124-2130.
- 1106 **Kjesbu, O. S., Klungsøyr, J., Kryvi, H., Witthames, P. R. and Walker, M.**  
1107 **G.** (1991). Fecundity, atresia, and egg size of captive Atlantic cod (*Gadus*  
1108 *morhua*) in relation to proximate body composition. *Canadian Journal of*  
1109 *Fisheries and Aquatic Sciences* **48**, 2333-2343.
- 1110 **Kojima, M., Hosoda, H., Date, Y., Nakazato, M., Matsuo, H. and**  
1111 **Kangawa, K.** (1999). Ghrelin is a growth-hormone-releasing acylated  
1112 peptide from stomach. *Nature* **402**, 656-660.
- 1113 **Kooijman, S.** (2001). Quantitative aspects of metabolic organization: a  
1114 discussion of concepts. *Philosophical Transactions of the Royal Society of*  
1115 *London Series B-Biological Sciences* **356**, 331-349.
- 1116 **Kooijman, S. A. L. M.** (1993). Dynamic energy budgets in biological  
1117 systems : theory and applications in ecotoxicology. Cambridge: Cambridge  
1118 University Press.
- 1119 **Krause, J. and Godin, J. G. J.** (1996). Influence of prey foraging posture  
1120 on flight behavior and predation risk: Predators take advantage of unwary  
1121 prey. *Behavioral Ecology* **7**, 264-271.
- 1122 **Kuba, J., Blaszczyk, B., Stankiewicz, T., Skuratko, A. and Udala, J.**  
1123 (2015). Analysis of annual changes in the concentrations of selected macro-  
1124 and microelements, thyroxine, and testosterone in the serum of Red Deer  
1125 (*Cervus elaphus*) stags. *Biological Trace Element Research* **168**, 356-361.
- 1126 **Lambert, Y. and Dutil, J. D.** (1997a). Can simple condition indices be  
1127 used to monitor and quantify seasonal changes in the energy reserves of  
1128 cod (*Gadus morhua*)? *Canadian Journal of Fisheries and Aquatic Sciences* **54**,  
1129 104-112.
- 1130 **Lambert, Y. and Dutil, J. D.** (1997b). Condition and energy reserves of  
1131 Atlantic cod (*Gadus morhua*) during the collapse of the northern Gulf of St.  
1132 Lawrence stock. *Canadian Journal of Fisheries and Aquatic Sciences* **54**,  
1133 2388-2400.
- 1134 **Lanfranco, F., Gianotti, L., Giordano, R., Pellegrino, M., Maccario, M.**  
1135 **and Arvat, E.** (2003). Ageing, growth hormone and physical performance.  
1136 *Journal of Endocrinological Investigation* **26**, 861-872.

- 1137 **Lanni, A., Moreno, M., Lombardi, A., de Lange, P. and Goglia, F.** (2001).  
1138 Control of energy metabolism by iodothyronines. *Journal of*  
1139 *Endocrinological Investigation* **24**, 897-913.
- 1140 **Lartey, L. J., Werneck-de-Castro, J. P., O-Sullivan, I., Unterman, T. G.**  
1141 **and Bianco, A. C.** (2015). Coupling between Nutrient Availability and  
1142 Thyroid Hormone Activation. *Journal of Biological Chemistry* **290**, 30551-  
1143 30561.
- 1144 **Lescroart, O., Roelants, I., Darras, V. M., Kuhn, E. R. and Ollevier, F.**  
1145 (1998). Apomorphine-induced growth hormone release in African catfish  
1146 (*Clarias gariepinus*) is related to the animal's nutritional status. *Fish*  
1147 *Physiology and Biochemistry* **18**, 353-361.
- 1148 **Lima, S. L.** (1998). Stress and decision making under the risk of  
1149 predation: Recent developments from behavioral, reproductive, and  
1150 ecological perspectives. *Stress and Behavior* **27**, 215-290.
- 1151 **Lima, S. L. and Dill, L. M.** (1990). Behavioral decisions made under the  
1152 risk of predation: a review and prospectus. *Canadian Journal of Zoology-*  
1153 *Revue Canadienne De Zoologie* **68**, 619-640.
- 1154 **Little, A. G. and Seebacher, F.** (2014). Thyroid hormone regulates  
1155 cardiac performance during cold acclimation in zebrafish (*Danio rerio*).  
1156 *Journal of Experimental Biology* **217**, 718-725.
- 1157 **Lubkin, M. and Stricker-Krongrad, A.** (1998). Independent feeding and  
1158 metabolic actions of orexins in mice. *Biochemical and Biophysical Research*  
1159 *Communications* **253**, 241-245.
- 1160 **MacKenzie, D. S., VanPutte, C. M. and Leiner, K. A.** (1998). Nutrient  
1161 regulation of endocrine function in fish. *Aquaculture* **161**, 3-25.
- 1162 **Malik, R. and Hodgson, H.** (2002). The relationship between the thyroid  
1163 gland and the liver. *Qjm-an International Journal of Medicine* **95**, 559-569.
- 1164 **Marras, S., Claireaux, G., McKenzie, D. J. and Nelson, J. A.** (2010).  
1165 Individual variation and repeatability in aerobic and anaerobic swimming  
1166 performance of European sea bass, *Dicentrarchus labrax*. *Journal of*  
1167 *Experimental Biology* **213**, 26-32.
- 1168 **Matsuda, K., Azuma, M. and Kang, K. S.** (2012). Orexin system in teleost  
1169 fish. In *Vitamins and Hormones: Sleep Hormones, Vol 89*, vol. 89 (ed. G.  
1170 Litwack), pp. 341-361. San Diego: Elsevier Academic Press Inc.
- 1171 **Matsuda, K., Kang, K. S., Sakashita, A., Yahashi, S. and Vaudry, H.**  
1172 (2011). Behavioral effect of neuropeptides related to feeding regulation in  
1173 fish. In *Trends in Neuroendocrinology*, vol. 1220 eds. H. Vaudry and M. C.  
1174 Tonon), pp. 117-126. Oxford: Blackwell Science Publ.
- 1175 **McNamara, J. M. and Houston, A. I.** (2009). Integrating function and  
1176 mechanism. *Trends in Ecology & Evolution* **24**, 670-675.
- 1177 **Miura, M., Tanaka, K., Komatsu, Y., Suda, M., Yasoda, A., Sakuma, Y.,**  
1178 **Ozasa, A. and Nakao, K.** (2002). Thyroid hormones promote chondrocyte

- 1179 differentiation in mouse ATDC5 cells and stimulate endochondral  
1180 ossification in fetal mouse tibias through lodothyronine deiodinases in the  
1181 growth plate. *Journal of Bone and Mineral Research* **17**, 443-454.
- 1182 **Miura, T., Maruyama, K., Shimakura, S. I., Kaiya, H., Uchiyama, M.,**  
1183 **Kangawa, K., Shioda, S. and Matsuda, K.** (2007). Regulation of food intake  
1184 in the goldfish by interaction between ghrelin and orexin. *Peptides* **28**,  
1185 1207-1213.
- 1186 **Mozsar, A., Boros, G., Saly, P., Antal, L. and Nagy, S. A.** (2015).  
1187 Relationship between Fulton's condition factor and proximate body  
1188 composition in three freshwater fish species. *Journal of Applied Ichthyology*  
1189 **31**, 315-320.
- 1190 **Mullur, R., Liu, Y.-Y. and Brent, G. A.** (2014). Thyroid Hormone  
1191 Regulation of Metabolism. *Physiological Reviews* **94**, 355-382.
- 1192 **Müller, T. D., Nogueiras, R., Andermann, M. L., Andrews, Z. B., Anker,**  
1193 **S. D., Argente, J., Batterham, R. L., Benoit, S. C., Bowers, C. Y., Broglio, F.**  
1194 **et al.** (2015). Ghrelin. *Molecular Metabolism* **4**, 437-460.
- 1195 **Nakamachi, T., Matsuda, K., Maruyama, K., Miura, T., Uchiyama, M.,**  
1196 **Funahashi, H., Sakurai, T. and Shioda, S.** (2006). Regulation by orexin of  
1197 feeding behaviour and locomotor activity in the goldfish. *Journal of*  
1198 *Neuroendocrinology* **18**, 290-297.
- 1199 **Nilni, E. A.** (2010). Regulation of the hypothalamic Thyrotropin  
1200 Releasing Hormone (TRH) neuron by neuronal and peripheral inputs.  
1201 *Frontiers in Neuroendocrinology* **31**, 134-156.
- 1202 **Nilni, E. A., Vaslet, C., Harris, M., Hollenberg, A., Bjørnbæk, C. and**  
1203 **Flier, J. S.** (2000). Leptin regulates prothyrotropin-releasing hormone  
1204 biosynthesis - Evidence for direct and indirect pathways. *Journal of*  
1205 *Biological Chemistry* **275**, 36124-36133.
- 1206 **Nilsson, O., Marino, R., De Luca, F., Phillip, M. and Baron, J.** (2005).  
1207 Endocrine regulation of the growth plate. *Hormone Research* **64**, 157-165.
- 1208 **Nisbet, R. M., Muller, E. B., Lika, K. and Kooijman, S.** (2000). From  
1209 molecules to ecosystems through dynamic energy budget models. *Journal of*  
1210 *Animal Ecology* **69**, 913-926.
- 1211 **Oka, Y., Kanbayashi, T., Mezaki, T., Iseki, K., Matsubayashi, J.,**  
1212 **Murakami, G., Matsui, M., Shimizu, T. and Shibasaki, H.** (2004). Low CSF  
1213 hypocretin-1/orexin-A associated with hypersomnia secondary to  
1214 hypothalamic lesion in a case of multiple sclerosis. *Journal of Neurology*  
1215 **251**, 885-886.
- 1216 **Ono, H., Hoshino, Y., Yasuo, S., Watanabe, M., Nakane, Y., Murai, A.,**  
1217 **Ebihara, S., Korf, H. W. and Yoshimura, T.** (2008). Involvement of  
1218 thyrotropin in photoperiodic signal transduction in mice. *Proceedings of the*  
1219 *National Academy of Sciences of the United States of America* **105**, 18238-  
1220 18242.

- 1221 **Pangle, K. L. and Sutton, T. M.** (2005). Temporal changes in the  
1222 relationship between condition indices and proximate composition of  
1223 juvenile *Coregonus artedii*. *Journal of Fish Biology* **66**, 1060-1072.
- 1224 **Penney, C. C. and Volkoff, H.** (2014). Peripheral injections of  
1225 cholecystokinin, apelin, ghrelin and orexin in cavefish (*Astyanax fasciatus*  
1226 *mexicanus*): Effects on feeding and on the brain expression levels of  
1227 tyrosine hydroxylase, mechanistic target of rapamycin and appetite-related  
1228 hormones. *General and Comparative Endocrinology* **196**, 34-40.
- 1229 **Persson, L., Andersson, J., Wahlstrom, E. and Eklov, P.** (1996). Size-  
1230 specific interactions in lake systems: Predator gape limitation and prey  
1231 growth rate and mortality. *Ecology* **77**, 900-911.
- 1232 **Peter, R. E. and Marchant, T. A.** (1995). The endocrinology of growth in  
1233 carp and related species. *Aquaculture* **129**, 299-321.
- 1234 **Peterson, I. and Wroblewski, J. S.** (1984). Mortality rate of fishes in the  
1235 pelagic ecosystem. *Canadian Journal of Fisheries and Aquatic Sciences* **41**,  
1236 1117-1120.
- 1237 **Power, D. M., Melo, J. and Santos, C. R. A.** (2000). The effect of food  
1238 deprivation and refeeding on the liver, thyroid hormones and transthyretin  
1239 in sea bream. *Journal of Fish Biology* **56**, 374-387.
- 1240 **Priede, I. G.** (1985). Metabolic scope in fishes. In *Fish energetics: New*  
1241 *perspectives*, eds. P. Tytler and P. Calow), pp. 33-64. Baltimor, MA: John  
1242 Hopkins University Press
- 1243 **Raven, P. A., Uh, M., Sakhrani, D., Beckman, B. R., Cooper, K., Pinter,**  
1244 **J., Leder, E. H., Silverstein, J. and Devlin, R. H.** (2008). Endocrine effects of  
1245 growth hormone overexpression in transgenic coho salmon. *General and*  
1246 *Comparative Endocrinology* **159**, 26-37.
- 1247 **Reale, D., Garant, D., Humphries, M. M., Bergeron, P., Careau, V. and**  
1248 **Montiglio, P. O.** (2010). Personality and the emergence of the pace-of-life  
1249 syndrome concept at the population level. *Philosophical Transactions of the*  
1250 *Royal Society B-Biological Sciences* **365**, 4051-4063.
- 1251 **Reznick, D., Nunney, L. and Tessier, A.** (2000). Big houses, big cars,  
1252 superfleas and the costs of reproduction. *Trends in Ecology & Evolution* **15**,  
1253 421-425.
- 1254 **Richmond, J. P., Du Dot, T. J., Rosen, D. A. S. and Zinn, S. A.** (2010).  
1255 Seasonal Influence on the Response of the Somatotropic Axis to Nutrient  
1256 Restriction and Re-alimentation in Captive Steller Sea Lions (*Eumetopias*  
1257 *jubatus*). *Journal of Experimental Zoology Part a-Ecological Genetics and*  
1258 *Physiology* **313A**, 144-156.
- 1259 **Robson, H., Siebler, T., Shalet, S. M. and Williams, G. R.** (2002).  
1260 Interactions between GH, IGF-I, glucocorticoids, and thyroid hormones  
1261 during skeletal growth. *Pediatric Research* **52**.



- 1262        **Rodgers, R. J., Halford, J. C. G., de Souza, R. L. N., de Souza, A. L. C.,**  
1263 **Piper, D. C., Arch, J. R. S. and Blundell, J. E.** (2000). Dose-response effects  
1264 of orexin-A on food intake and the behavioural satiety sequence in rats.  
1265 *Regulatory Peptides* **96**, 71-84.
- 1266        **Rodgers, R. J., Ishii, Y., Halford, J. C. G. and Blundell, J. E.** (2002).  
1267 Orexins and appetite regulation. *Neuropeptides* **36**, 303-325.
- 1268        **Rome, L. C., Funke, R. P., Alexander, R. M., Lutz, G., Aldridge, H., Scott,**  
1269 **F. and Freadman, M.** (1988). WHY ANIMALS HAVE DIFFERENT MUSCLE-  
1270 FIBER TYPES. *Nature* **335**, 824-827.
- 1271        **Rountree, R. A. and Sedberry, G. R.** (2009). A theoretical model of  
1272 shoaling behavior based on a consideration of patterns of overlap among  
1273 the visual fields of individual members. *Acta Ethologica* **12**, 61-70.
- 1274        **Rønnestad, I., Gomes, A. S., Murashita, K., Angotzi, R., Jonsson, E. and**  
1275 **Volkoff, H.** (2017). Appetite-Controlling Endocrine Systems in Teleosts.  
1276 *Frontiers in Endocrinology* **8**, 24.
- 1277        **Sakurai, T., Amemiya, A., Ishii, M., Matsuzaki, I., Chemelli, R. M.,**  
1278 **Tanaka, H., Williams, S. C., Richardson, J. A., Kozlowski, G. P., Wilson, S.**  
1279 **et al.** (1998). Orexins and orexin receptors: A family of hypothalamic  
1280 neuropeptides and G protein-coupled receptors that regulate feeding  
1281 behavior. *Cell* **92**, 573-585.
- 1282        **Salzman, T. C., McLaughlin, A. L., Westneat, D. F. and Crowley, P. H.**  
1283 (2018). Energetic trade-offs and feedbacks between behavior and  
1284 metabolism influence correlations between pace-of-life attributes.  
1285 *Behavioral Ecology and Sociobiology* **72**, 18.
- 1286        **Sih, A.** (1992). PREY UNCERTAINTY AND THE BALANCING OF  
1287 ANTIPREDATOR AND FEEDING NEEDS. *American Naturalist* **139**, 1052-  
1288 1069.
- 1289        **Silberman, D. M., Wald, M. and Genaro, A. M.** (2002). Effects of chronic  
1290 mild stress on lymphocyte proliferative response. Participation of serum  
1291 thyroid hormones and corticosterone. *International Immunopharmacology*  
1292 **2**, 487-497.
- 1293        **Silva, J. E.** (2003). The Thermogenic Effect of Thyroid Hormone and Its  
1294 Clinical Implications. *Annals of Internal Medicine* **139**, 205-213.
- 1295        **Sinervo, B. and Svensson, E.** (1998). Mechanistic and selective causes of  
1296 life history trade-offs and plasticity. *Oikos* **83**, 432-442.
- 1297        **Sundström, L. F. and Devlin, R. H.** (2011). Increased intrinsic growth  
1298 rate is advantageous even under ecologically stressful conditions in coho  
1299 salmon (*Oncorhynchus kisutch*). *Evolutionary Ecology* **25**, 447-460.
- 1300        **Sundström, L. F., Lohmus, M. and Devlin, R. H.** (2005). Selection on  
1301 increased intrinsic growth rates in coho salmon, *Oncorhynchus kisutch*.  
1302 *Evolution* **59**, 1560-1569.

- 1303       **Sundström, L. F., Lohmus, M., Johnsson, J. I. and Devlin, R. H.** (2004).  
1304 Growth hormone transgenic salmon pay for growth potential with  
1305 increased predation mortality. *Proceedings of the Royal Society B-Biological*  
1306 *Sciences* **271**, S350-S352.
- 1307       **Suttie, J. M., Breier, B. H., Gluckman, P. D., Littlejohn, R. P. and**  
1308 **Webster, J. R.** (1992). Effects of melatonin implants on insulin-like growth  
1309 factor 1 in male red deer (*Cervus elaphus*). *General and Comparative*  
1310 *Endocrinology* **87**, 111-119.
- 1311       **Suttie, J. M., White, R. G., Breier, B. H. and Gluckman, P. D.** (1991).  
1312 Photoperiod associated changes in insulin-like growth factor-I in reindeer.  
1313 *Endocrinology* **129**, 679-682.
- 1314       **Suttie, J. M., White, R. G., Manley, T. R., Breier, B. H., Gluckman, P. D.,**  
1315 **Fennessy, P. F. and Woodford, K.** (1993). Insulin-like growth factor 1 and  
1316 growth seasonality in reindeer (*Rangifer tarandus*) - comparisons with  
1317 temperate and tropical cervids. *Rangifer* **13**.
- 1318       **Tagawa, M., Ogasawara, T., Sakamoto, T., Miura, T., Yamauchi, K. and**  
1319 **Hirano, T.** (1994). Thyroid hormone concentrations in the gonads of wild  
1320 chum salmon during maturation. *Fish Physiology and Biochemistry* **13**, 233-  
1321 240.
- 1322       **Tinbergen, N.** (1963). On Aims and Methods of Ethology. *Zeitschrift für*  
1323 *Tierpsychologie* **20**, 410-433.
- 1324       **Toguyeni, A., Baroiller, J. F., Fostier, A., LeBail, P. Y., Kuhn, E. R., Mol,**  
1325 **K. A. and Fauconneau, B.** (1996). Consequences of food restriction on  
1326 short-term growth variation and on plasma circulating hormones in  
1327 *Oreochromis niloticus* in relation to sex. *General and Comparative*  
1328 *Endocrinology* **103**, 167-175.
- 1329       **Tomasik, P. J., Spodaryk, M. and Sztéfko, K.** (2004). Plasma  
1330 concentrations of orexins in children. *Annals of Nutrition and Metabolism*  
1331 **48**, 215-220.
- 1332       **Uchida, K., Kajimura, S., Riley, L. G., Hirano, T., Aida, K. and Grau, E. G.**  
1333 (2003). Effects of fasting on growth hormone/insulin-like growth factor I  
1334 axis in the tilapia, *Oreochromis mossambicus*. *Comparative Biochemistry and*  
1335 *Physiology Part A: Molecular & Integrative Physiology* **134**, 429-439.
- 1336       **Van der Geyten, S., Mol, K. A., Pluymers, W., Kuhn, E. R. and Darras, V.**  
1337 **M.** (1998). Changes in plasma T-3 during fasting/refeeding in tilapia  
1338 (*Oreochromis niloticus*) are mainly regulated through changes in hepatic  
1339 type II iodothyronine deiodinase. *Fish Physiology and Biochemistry* **19**, 135-  
1340 143.
- 1341       **van der Post, D. J. and Semmann, D.** (2011). Patch depletion, niche  
1342 structuring and the evolution of co-operative foraging. *Bmc Evolutionary*  
1343 *Biology* **11**, 16.

- 1344 **Varghese, S. and Oommen, O. V.** (1999). Thyroid hormones regulate  
1345 lipid metabolism in a teleost *Anabas testudineus* (Bloch). *Comparative*  
1346 *Biochemistry and Physiology B-Biochemistry & Molecular Biology* **124**, 445-  
1347 450.
- 1348 **Varghese, S., Shameena, B. and Oommen, O. V.** (2001). Thyroid  
1349 hormones regulate lipid peroxidation and antioxidant enzyme activities in  
1350 *Anabas testudineus* (Bloch). *Comparative Biochemistry and Physiology B-*  
1351 *Biochemistry & Molecular Biology* **128**, 165-171.
- 1352 **Velez, E. J., Perello-Amoros, M., Lutfi, E., Azizi, S., Capilla, E., Navarro,**  
1353 **I., Perez-Sanchez, J., Calduch-Giner, J. A., Blasco, J., Fernandez-Borras, J.**  
1354 **et al.** (2019). A long-term growth hormone treatment stimulates growth  
1355 and lipolysis in gilthead sea bream juveniles. *Comparative Biochemistry and*  
1356 *Physiology a-Molecular & Integrative Physiology* **232**, 67-78.
- 1357 **Vermeulen, A.** (2002). Ageing, hormones, body composition, metabolic  
1358 effects. *World Journal of Urology* **20**, 23-27.
- 1359 **Volkoff, H., Bjorklund, J. M. and Peter, R. E.** (1999). Stimulation of  
1360 feeding behavior and food consumption in the goldfish, *Carassius auratus*,  
1361 by orexin-A and orexin-B. *Brain Research* **846**, 204-209.
- 1362 **Volkoff, H., Eykelbosh, A. J. and Peter, R. E.** (2003). Role of leptin in the  
1363 control of feeding of goldfish *Carassius auratus*: interactions with  
1364 cholecystokinin, neuropeptide Y and orexin A, and modulation by fasting.  
1365 *Brain Research* **972**, 90-109.
- 1366 **Waung, J. A., Bassett, J. H. D. and Williams, G. R.** (2012). Thyroid  
1367 hormone metabolism in skeletal development and adult bone maintenance.  
1368 *Trends in Endocrinology and Metabolism* **23**, 155-162.
- 1369 **Webb, P.** (2004). Selective activators of thyroid hormone receptors.  
1370 *Expert Opinion on Investigational Drugs* **13**, 489-500.
- 1371 **Weber, J. M., Choi, K., Gonzalez, A. and Omlin, T.** (2016). Metabolic fuel  
1372 kinetics in fish: swimming, hypoxia and muscle membranes. *Journal of*  
1373 *Experimental Biology* **219**, 250-258.
- 1374 **Yang, B. Y., Zhai, G., Gong, Y. L., Su, J. Z., Peng, X. Y., Shang, G. H., Han,**  
1375 **D., Jin, J. Y., Liu, H. K., Du, Z. Y. et al.** (2018). Different physiological roles of  
1376 insulin receptors in mediating nutrient metabolism in zebrafish. *American*  
1377 *Journal of Physiology-Endocrinology and Metabolism* **315**, E38-E51.
- 1378 **Youson, J. H., Plisetskaya, E. M. and Leatherland, J. F.** (1994).  
1379 Concentrations of insulin and thyroid hormones in the serum of landlocked  
1380 Sea lampreys (*Petromyzon marinus*) of three larval year classes, in larvae  
1381 exposed to two temperature regimes, and in individuals during and after  
1382 metamorphosis. *General and Comparative Endocrinology* **94**, 294-304.
- 1383 **Zadik, Z., Chalew, S. A., Mccarter, R. J., Meistas, M. and Kowarski, A. A.**  
1384 (1985). The Influence of Age on the 24-Hour Integrated Concentration of

1385 Growth-Hormone in Normal Individuals. *Journal of Clinical Endocrinology &*  
1386 *Metabolism* **60**, 513-516.

1387 **Zoeller, R. T., Tan, S. W. and Tyl, R. W.** (2007). General background on  
1388 the hypothalamic-pituitary-thyroid (HPT) axis. *Critical Reviews in*  
1389 *Toxicology* **37**, 11-53.

1390 **Zonneveld, C. and Kooijman, S.** (1989). Application of a dynamic energy  
1391 budget model to *Lymnaea stagnalis* (L). *Functional Ecology* **3**, 269-278.

1392

1393

## 1394 **Figure legends**

1395 Figure 1. **Energetics and endocrinology of the model organism.** Energy from food is made accessible  
1396 for the body by digestion (SDA). This energy is then used in metabolism to maintain life-supporting  
1397 metabolic pathways (SMR) and supply the organism with oxygen. Also activities like foraging use  
1398 energy. The surplus is stored in reserves. Hormonal regulation determines the foraging intensity  
1399 (OXF), in- or decreases of metabolism rates (oxygen uptake & SMR), and the allocation of energy to  
1400 growth (GHF). Throughout the simulation decisions regarding hormone levels are based on the two  
1401 states of the fish – reserve and body size.

1402 Figure 2. **Endocrine regulation, energy and oxygen budget, mortality and growth of juvenile fish in**  
1403 **a stable food environment.** The simulation starts when the fish is 10 cm and ends at 30 cm, with the  
1404 x-axis giving time (in weeks since 10 cm) in all panels. In A) the growth hormone function, B) orexin  
1405 function, and C) thyroid hormone function, is given as a function of time. D) Weekly growth and  
1406 accumulated body mass, E-G) energy budget, oxygen budget and mortality rate, respectively.

1407 Figure 3 **Environmental impact on hormone levels, energy and oxygen budgets, survival and**  
1408 **generation time.** The x-axis is the same in all panels, with a gradual increase in food abundance  
1409 relative to the average food environment used in Fig. 2. Simulations of fish in 13 food environments  
1410 are compared, at individual length around 20 cm. A) Hormone levels B) Energetic costs from growth  
1411 and metabolism. C) Free scope, as the difference between maximum oxygen uptake and the sum of  
1412 processes consuming oxygen. D) Five different components contribute to mortality. E) Growth time  
1413 and survival over the entire juvenile life phase of the fish.

## 1414 **Appendices**

1415 Table A1 Parameters used in the growth model of a generalized fish using hormonal strategies to  
1416 adapt to environmental challenges.

| Parameters<br>Name | Value | Unit | Definition                           | Literature                  |
|--------------------|-------|------|--------------------------------------|-----------------------------|
| $a$                | 0.7   | -    | Exponent for standard metabolic rate | (Clarke and Johnston, 1999) |

|                             |                  |                            |                                                                                      |                             |
|-----------------------------|------------------|----------------------------|--------------------------------------------------------------------------------------|-----------------------------|
| $b$                         | 0.7              | -                          | Exponent for calculation of maximum aerobic scope                                    | -                           |
| $d_{reserves}$              | 5 000            | $J g^{-1}$                 | Energy density of reserves                                                           | -                           |
| $d_{structure}$             | 4 000            | $J g^{-1}$                 | Energy density of soma                                                               | -                           |
| $k_{conversion\_growth}$    | 0.75             | -                          | Efficiency of converting metabolites from reserves to soma                           | -                           |
| $k_{conversion\_reserves}$  | 0.85             | -                          | Efficiency of converting metabolites between blood and reserves                      | -                           |
| $k_{foraging}$              | 0.2              | -                          | Scaling factor for energetic cost of foraging                                        | -                           |
| $k_{growth}$                | 0.28             | -                          | Upper limit for proportional increase in structural body mass                        | -                           |
| $k_{Fultons\_max}$          | $1.2 * 10^{-8}$  | $g cm^{-1}$                | Fulton's condition factor for fish with full reserves                                | (Lambert and Dutil, 1997b)  |
| $k_{Fultons\_min}$          | $0.85 * 10^{-8}$ | $g cm^{-1}$                | Fulton's condition factor for lean fish                                              | (Lambert and Dutil, 1997b)  |
| $k_{MinutesPerWeek}$        | 10080            | -                          | Number of minutes in one time step                                                   | -                           |
| $k_{OXF}$                   | 5                | -                          | Scaling factor for effect of OXF on intake (including urinary and fecal energy loss) | -                           |
| $k_{scope}$                 | $2.58 * 10^{-5}$ | $J min^{-1} g^{-b}$        | Coefficient for calculation of maximum aerobic scope                                 | (Claireaux et al., 2000)    |
| $k_{SDA}$                   | 0.15             | -                          | Coefficient for calculation of SDA                                                   | -                           |
| $k_{SMR}$                   | 89596.7          | $J min^{-1} g^{-a}$        | Scaling factor for standard metabolic rate                                           | (Clarke and Johnston, 1999) |
| $k_{THF\_scope}$            | 0.24             | -                          | Scaling factor determining the strength of THF on AMR                                | -                           |
| $k_{THF\_SMR}$              | 0.23             | -                          | Scaling factor determining the strength of THF on SMR                                | -                           |
| $m_{fixed}$                 | 0.0002           | $year^{-1}$                | Background mortality rate (constant)                                                 | -                           |
| $m_{foraging}$              | 0.08             | -                          | Coefficient for calculation of foraging-related mortality rate                       | -                           |
| $m_{foraging \times scope}$ | 0.9              | year                       | Coefficient for calculation of active-while-vulnerable mortality rate                | -                           |
| $m_{scope}$                 | 0.8              | -                          | Coefficient for calculation of scope-related mortality rate                          | -                           |
| $m_{size}$                  | 0.038            | $year^{-1} cm^{-x_{size}}$ | Coefficient for calculation of size-dependent mortality rate                         | -                           |
| $x_{foraging}$              | 2                | -                          | Exponent for calculation of foraging-related mortality rate                          | -                           |
| $x_{scope}$                 | 3                | -                          | Exponent for calculation of scope-related mortality rate                             | -                           |
| $x_{size}$                  | -0.75            | -                          | Exponent for calculation of size-dependent mortality rate                            | -                           |
| $\alpha_{max}$              | 1500             | $pg ml^{-1}$               | Maximum value of OXF                                                                 | -                           |
| $\gamma_{max}$              | 200              | $ng ml^{-1}$               | Maximum value of GHF                                                                 | -                           |
| $\tau_{max}$                | 5                | $ng ml^{-1}$               | Maximum value of THF                                                                 | -                           |

1417

1418 Table A2 Variables used in a state-dependent fish growth model using optimized hormonal  
1419 strategies.

| Variables                                 |                      |                                                                                   |
|-------------------------------------------|----------------------|-----------------------------------------------------------------------------------|
| Name                                      | Unit                 | Definition                                                                        |
| $A_{\max}$                                | $\text{J min}^{-1}$  | Maximum aerobic scope under influence of THF                                      |
| $A_{\text{standard}}$                     | $\text{J min}^{-1}$  | Maximum aerobic scope (AMR)                                                       |
| $B_{\text{foraging}}$                     | -                    | Foraging behaviour                                                                |
| $C$                                       | $\text{J min}^{-1}$  | Energetic costs of building new tissue (soma and reserves)                        |
| $C_{\text{growth}}$                       | J                    | Energy incorporated in new structural tissue                                      |
| $E$                                       | -                    | Food abundance in environment                                                     |
| $I$                                       | $\text{J min}^{-1}$  | Intake (corresponds to metabolizable energy)                                      |
| $L$                                       | cm                   | Body length                                                                       |
| $M$                                       | $\text{year}^{-1}$   | Total mortality rate                                                              |
| $M_{\text{foraging}}$                     | $\text{year}^{-1}$   | Foraging-related mortality rate                                                   |
| $M_{\text{foraging} \times \text{scope}}$ | $\text{year}^{-1}$   | Active-while-vulnerable mortality rate                                            |
| $M_{\text{scope}}$                        | $\text{year}^{-1}$   | Scope-related mortality rate                                                      |
| $M_{\text{size}}$                         | $\text{year}^{-1}$   | Size-dependent mortality rate                                                     |
| $P$                                       | $\text{J min}^{-1}$  | Metabolic processes                                                               |
| $P_{\text{foraging}}$                     | $\text{J min}^{-1}$  | Swimming cost of foraging behaviour                                               |
| $P_{\text{growth}}$                       | $\text{J min}^{-1}$  | Cost of converting metabolites from reserves into new structural tissue           |
| $P_{\text{reserves}}$                     | $\text{J min}^{-1}$  | Cost of converting metabolites from bloodstream into fat and proteins for storage |
| $P_{\text{SDA}}$                          | $\text{J min}^{-1}$  | Cost of digestion and energy uptake into bloodstream                              |
| $P_{\text{SMR}}$                          | $\text{J min}^{-1}$  | Standard metabolic rate (SMR) under influence of THF                              |
| $P_{\text{standard}}$                     | $\text{J min}^{-1}$  | Standard metabolic rate (SMR)                                                     |
| $P_{\text{structure}}$                    | $\text{J min}^{-1}$  | Standard metabolic rate based on structural weight                                |
| $R$                                       | J                    | Energy reserves                                                                   |
| $R_{\max}$                                | J                    | Maximum reserves depending on body size                                           |
| $\Delta R$                                | J                    | Energy incorporated in reserves (when negative, reserves are drained)             |
| $S$                                       | $\text{year}^{-1}$   | Survival probability                                                              |
| $W$                                       | G                    | Body mass (structural and reserves)                                               |
| $W_{\text{structure}}$                    | G                    | Structural body mass                                                              |
| $\Delta W_{\text{structure}}$             | $\text{g week}^{-1}$ | Growth                                                                            |
| $\alpha$                                  | $\text{pg ml}^{-1}$  | Level of OXF                                                                      |
| $\gamma$                                  | $\text{ng ml}^{-1}$  | Level of GHF                                                                      |
| $\tau$                                    | $\text{ng ml}^{-1}$  | Level of THF                                                                      |

1420

1421

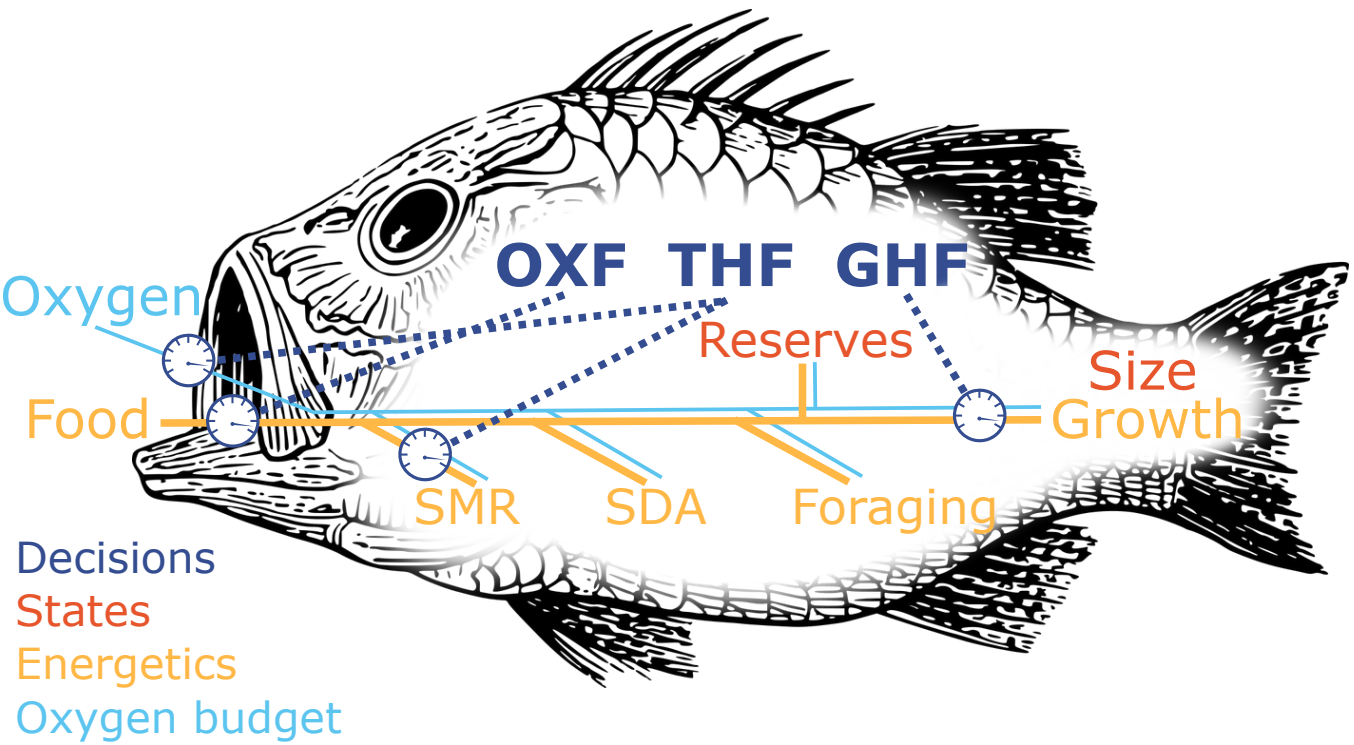

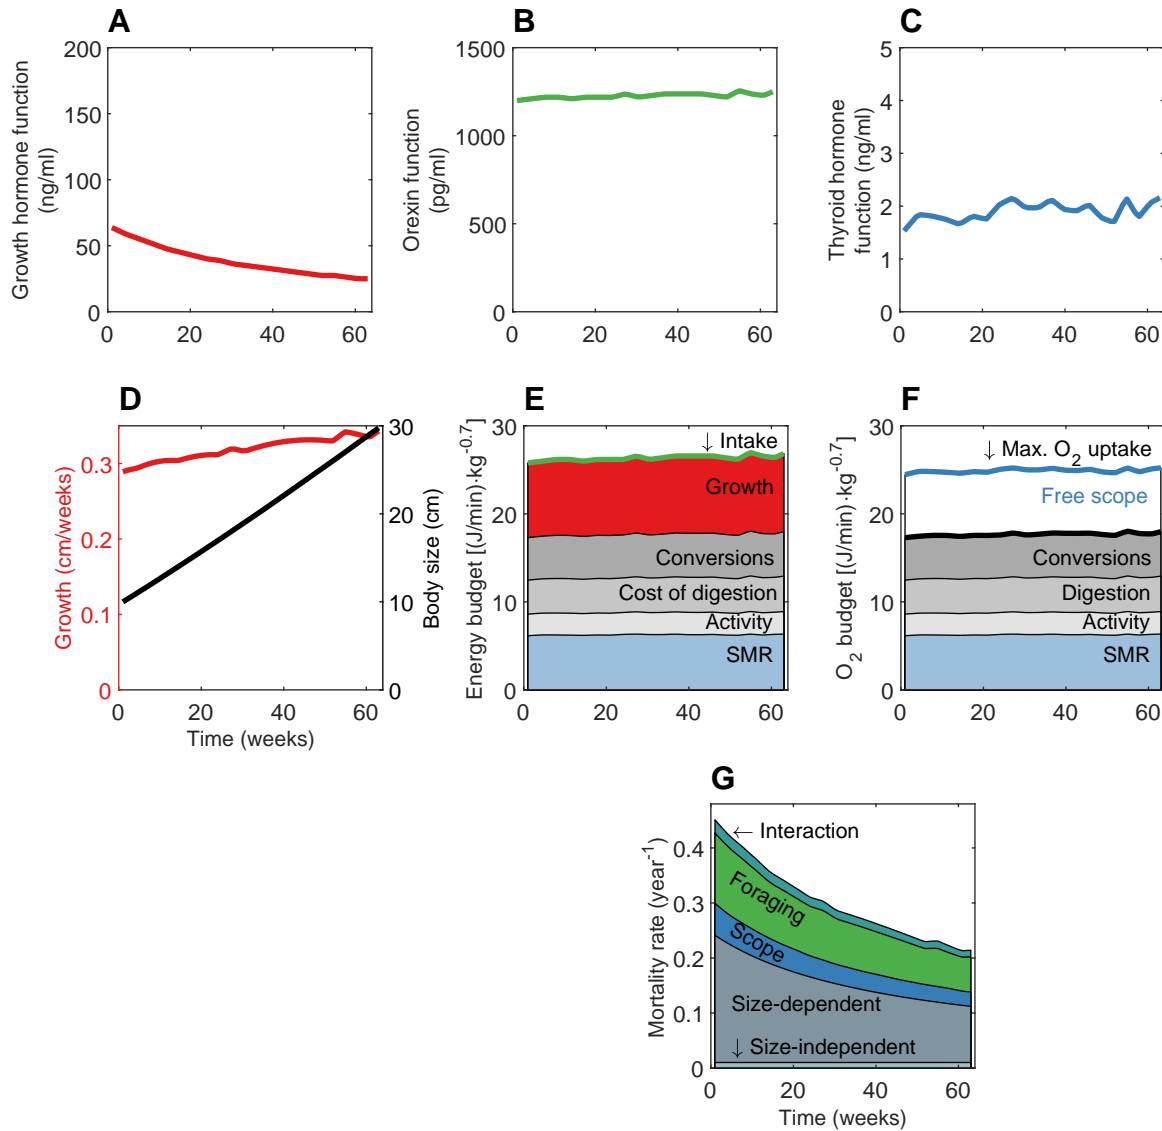



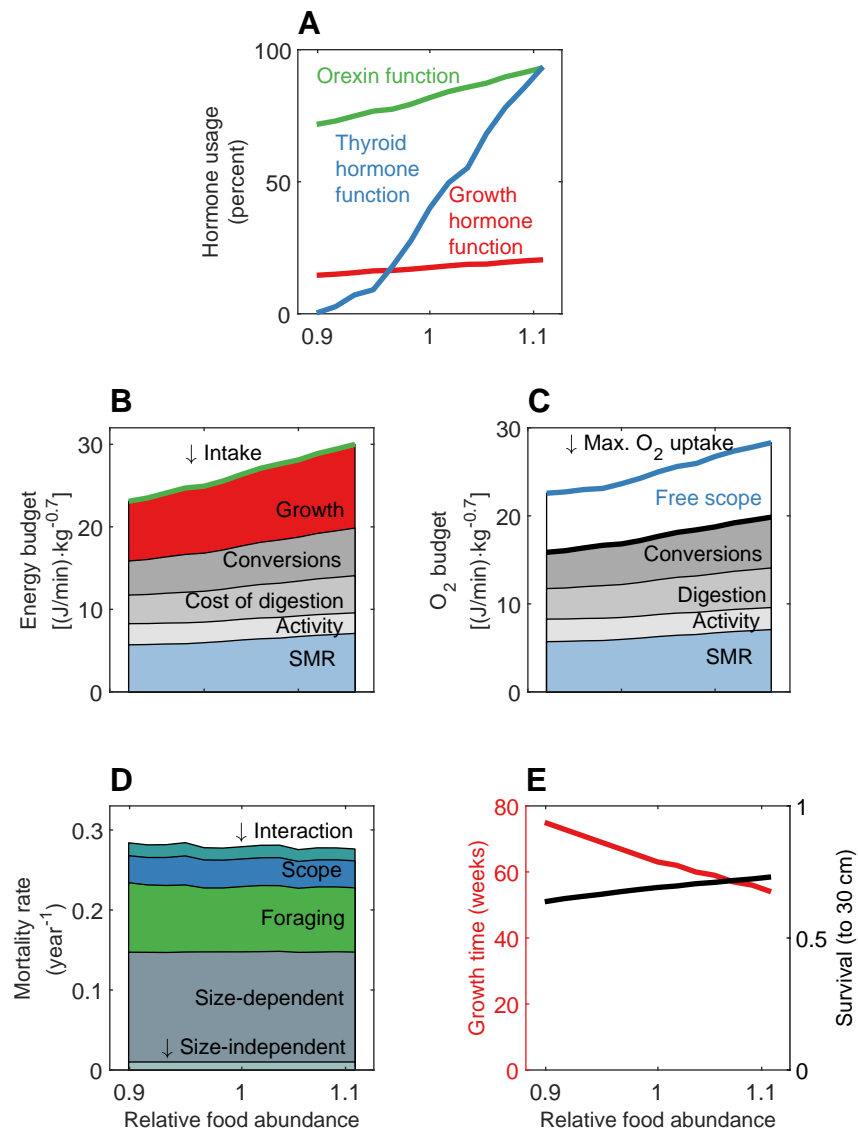

Source: https://www.biorxiv.org/content/10.1101/768689v1.full.pdf
